# Supplementary material for: Accuracy of ARGOS Locations of Pinnipeds at-Sea Estimated Using Fastloc GPS
Source: PLOS journal article supplement (doi:10.1371/journal.pone.0008677), 2010-01-14
Supplement: S1 (10.1371/journal.pone.0008677.s001) [file journal.pone.0008677.s001]

| <u>Species</u>     | <u>Animal ID</u> | <u>error (km)</u> | <u>angle</u> | <u>lat error(km)</u> | <u>lon error (km)</u> | <u>GPS residual</u> | <u>ARGOS LC</u> |
|--------------------|------------------|-------------------|--------------|----------------------|-----------------------|---------------------|-----------------|
| Galapagos sea lion | 19               | 1.5373            | 138.1207     | 1.1446               | -1.0263               | 15.6                | 0               |
| Galapagos sea lion | 19               | 5.4969            | 278.3526     | -0.7985              | 5.4386                | 14.3                | 0               |
| Galapagos sea lion | 19               | 7.5565            | 60.2603      | -3.7485              | -6.5612               | 2                   | 0               |
| Galapagos sea lion | 19               | 0.2392            | 166.7388     | 0.2328               | -0.0549               | 12.5                | 3               |
| Galapagos sea lion | 19               | 36.6264           | 102.439      | 7.8882               | -35.7667              | 1.1                 | B               |
| Galapagos sea lion | 19               | 1.2978            | 139.6045     | 0.9884               | -0.841                | 13.3                | 1               |
| Galapagos sea lion | 19               | 0.3934            | 86.9352      | -0.021               | -0.3929               | 10.7                | 1               |
| Galapagos sea lion | 19               | 0.8524            | 304.9264     | -0.488               | 0.6989                | 9.1                 | 1               |
| Galapagos sea lion | 19               | 4.4369            | 278.9589     | -0.691               | 4.3828                | 0.8                 | A               |
| Galapagos sea lion | 19               | 0.9654            | 277.0967     | -0.1193              | 0.958                 | 12.5                | 2               |
| Galapagos sea lion | 19               | 12.9292           | 32.9504      | -10.8495             | -7.0323               | 14.2                | 0               |
| Galapagos sea lion | 19               | 11.0073           | 139.2815     | 8.3426               | -7.1805               | 1.7                 | 0               |
| Galapagos sea lion | 19               | 1.1235            | 232.0088     | 0.6916               | 0.8854                | 7.7                 | 2               |
| Galapagos sea lion | 19               | 15.299            | 59.4693      | -7.7721              | -13.1779              | 1.1                 | A               |
| Galapagos sea lion | 19               | 3.8785            | 212.6013     | 3.2674               | 2.0897                | 0.2                 | B               |
| Galapagos sea lion | 19               | 0.4658            | 169.0732     | 0.4574               | -0.0883               | 0.3                 | 0               |
| Galapagos sea lion | 19               | 0.3243            | 92.7073      | 0.0153               | -0.324                | 27.8                | 1               |
| Galapagos sea lion | 19               | 1.1609            | 156.8905     | 1.0678               | -0.4557               | 11                  | 1               |
| Galapagos sea lion | 19               | 3.9713            | 268.8302     | 0.0811               | 3.9705                | 3                   | A               |
| Galapagos sea lion | 19               | 2.068             | 171.026      | 2.0427               | -0.3226               | 14.3                | 0               |
| Galapagos sea lion | 19               | 0.3246            | 65.0464      | -0.137               | -0.2943               | 0.2                 | A               |
| Galapagos sea lion | 19               | 11.3076           | 192.6217     | 11.0343              | 2.4709                | 1.1                 | A               |
| Galapagos sea lion | 19               | 3.4516            | 132.4066     | 2.3277               | -2.5486               | 12.4                | 1               |
| Galapagos sea lion | 19               | 9.2919            | 307.6987     | -5.6821              | 7.3521                | 12.4                | B               |
| Galapagos sea lion | 20               | 1.5554            | 16.119       | -1.4942              | -0.4318               | 12.7                | 0               |
| Galapagos sea lion | 20               | 3.9187            | 5.4427       | -3.9011              | -0.3717               | 4                   | 0               |
| Galapagos sea lion | 20               | 0.5964            | 337.4112     | -0.5506              | 0.2291                | 8.6                 | 1               |
| Galapagos sea lion | 20               | 1.8454            | 327.9424     | -1.564               | 0.9795                | 12.7                | 0               |
| Galapagos sea lion | 20               | 0.4564            | 93.7328      | 0.0297               | -0.4554               | 3.8                 | 3               |
| Galapagos sea lion | 20               | 0.3507            | 131.4262     | 0.232                | -0.2629               | 9.6                 | 2               |
| Galapagos sea lion | 20               | 0.4332            | 263.5381     | 0.0487               | 0.4304                | 15.8                | 0               |
| Galapagos sea lion | 20               | 1.0264            | 129.5388     | 0.6534               | -0.7915               | 11.2                | 2               |
| Galapagos sea lion | 20               | 8.2972            | 288.729      | -2.6642              | 7.8578                | 3.2                 | 0               |
| Galapagos sea lion | 20               | 3.5998            | 250.8304     | 1.182                | 3.4002                | 23.2                | 1               |
| Galapagos sea lion | 20               | 5.4498            | 314.9505     | -3.8502              | 3.8569                | 9.1                 | 1               |
| Galapagos sea lion | 20               | 8.371             | 144.1996     | 6.7894               | -4.8967               | 17.9                | Z               |
| Galapagos sea lion | 20               | 5.4027            | 144.4811     | 4.3973               | -3.1388               | 5.5                 | B               |
| Galapagos sea lion | 20               | 1.8155            | 259.9427     | 0.317                | 1.7876                | 18                  | 1               |
| Galapagos sea lion | 20               | 4.3042            | 86.0041      | -0.3                 | -4.2937               | 1.4                 | 0               |
| Galapagos sea lion | 20               | 1.1969            | 106.3165     | 0.3363               | -1.1487               | 2.6                 | 1               |
| Galapagos sea lion | 20               | 4.0097            | 155.218      | 3.6405               | -1.6807               | 0.2                 | B               |
| Galapagos sea lion | 20               | 1.2016            | 95.8915      | 0.1233               | -1.1952               | 0.3                 | 1               |
| Galapagos sea lion | 20               | 7.3306            | 148.6128     | 6.2579               | -3.8179               | 28                  | 0               |
| Galapagos sea lion | 20               | 0.93              | 62.9297      | -0.4232              | -0.8282               | 0.3                 | 1               |
| Galapagos sea lion | 20               | 0.8446            | 107.3295     | 0.2516               | -0.8062               | 0.7                 | 1               |
| Galapagos sea lion | 20               | 0.0959            | 213.4318     | 0.08                 | 0.0528                | 0.3                 | 2               |
| Galapagos sea lion | 20               | 1.2568            | 20.9854      | -1.1735              | -0.4501               | 3.8                 | 1               |
| Galapagos sea lion | 20               | 1.5053            | 151.9505     | 1.3285               | -0.7078               | 0.7                 | 2               |
| Galapagos sea lion | 20               | 3.707             | 52.0548      | -2.2795              | -2.9234               | 0.8                 | A               |
| Galapagos sea lion | 20               | 3.8117            | 0.3317       | -3.8117              | -0.0221               | 0.1                 | 0               |
| Galapagos sea lion | 20               | 2.8206            | 129.5418     | 1.7957               | -2.1752               | 0.2                 | 0               |
| Galapagos sea lion | 20               | 6.6079            | 188.1308     | 6.5414               | 0.9346                | 6.9                 | 0               |
| Galapagos sea lion | 20               | 2.2178            | 49.7444      | -1.4331              | -1.6926               | 1.5                 | A               |
| Galapagos sea lion | 21               | 4.3899            | 136.5898     | 3.189                | -3.0168               | 12.7                | 0               |
| Galapagos sea lion | 21               | 1.8302            | 210.2895     | 1.5803               | 0.9231                | 27.1                | B               |
| Galapagos sea lion | 21               | 0.2446            | 261.9908     | 0.0341               | 0.2422                | 2.4                 | 1               |
| Galapagos sea lion | 21               | 1.2682            | 21.1073      | -1.1832              | -0.4567               | 10.4                | A               |
| Galapagos sea lion | 21               | 0.2222            | 112.2364     | 0.0841               | -0.2057               | 20                  | 3               |
| Galapagos sea lion | 21               | 0.1293            | 42.7751      | -0.0949              | -0.0878               | 15.1                | 3               |
| Galapagos sea lion | 21               | 1.0283            | 260.5371     | 0.1691               | 1.0144                | 10.6                | 2               |
| Galapagos sea lion | 21               | 0.5411            | 70.3421      | -0.182               | -0.5096               | 15.5                | 1               |
| Galapagos sea lion | 21               | 0.134             | 338.6583     | -0.1249              | 0.0488                | 4.9                 | 1               |
| Galapagos sea lion | 21               | 0.2255            | 55.5576      | -0.1276              | -0.186                | 5.3                 | 2               |
| Galapagos sea lion | 21               | 42.9403           | 260.0496     | 7.4178               | 42.2943               | 3.2                 | Z               |

|                    |    |         |          |         |          |      |   |
|--------------------|----|---------|----------|---------|----------|------|---|
| Galapagos sea lion | 21 | 91.6702 | 109.8368 | 31.1002 | -86.2304 | 0.1  | B |
| Galapagos sea lion | 21 | 44.3046 | 106.8509 | 12.8411 | -42.4022 | 1    | Z |
| Galapagos sea lion | 21 | 1.5053  | 71.2646  | -0.4835 | -1.4256  | 0.6  | 1 |
| Galapagos sea lion | 21 | 11.2697 | 122.0361 | 5.9779  | -9.5535  | 9.7  | B |
| Galapagos sea lion | 21 | 0.4834  | 83.3779  | -0.0557 | -0.4802  | 22.9 | 2 |
| Galapagos sea lion | 21 | 0.2515  | 134.9695 | 0.1778  | -0.178   | 9.2  | 2 |
| Galapagos sea lion | 21 | 0.418   | 219.2067 | 0.3239  | 0.2643   | 12.6 | 1 |
| Galapagos sea lion | 21 | 0.1251  | 220.6351 | 0.0949  | 0.0815   | 0.5  | 3 |
| Galapagos sea lion | 21 | 0.4617  | 18.8223  | -0.437  | -0.1489  | 0.9  | 1 |
| Galapagos sea lion | 21 | 0.3443  | 348.1289 | -0.3369 | 0.0708   | 1.1  | 2 |
| Galapagos sea lion | 21 | 0.0918  | 24.0446  | -0.0838 | -0.0374  | 1.8  | 1 |
| Galapagos sea lion | 21 | 8.2246  | 198.675  | 7.7915  | 2.6335   | 0.7  | 2 |
| Galapagos sea lion | 21 | 0.0332  | 57.3062  | -0.0179 | -0.028   | 0.5  | 3 |
| Galapagos sea lion | 21 | 0.5325  | 347.7443 | -0.5204 | 0.113    | 0.7  | 1 |
| Galapagos sea lion | 21 | 0.9859  | 91.0474  | 0.018   | -0.9858  | 0.2  | 0 |
| Galapagos sea lion | 21 | 0.1458  | 291.5997 | -0.0537 | 0.1356   | 2    | 1 |
| Galapagos sea lion | 21 | 0.5961  | 359.1391 | -0.596  | 0.009    | 6.2  | 1 |
| Galapagos sea lion | 21 | 4.6828  | 55.2325  | -2.6704 | -3.8468  | 6    | 0 |
| Galapagos sea lion | 21 | 0.2853  | 236.7277 | 0.1565  | 0.2385   | 3.1  | 3 |
| Galapagos sea lion | 21 | 3.0191  | 180.419  | 3.019   | 0.0221   | 5    | A |
| Galapagos sea lion | 22 | 0.4459  | 11.2455  | -0.4374 | -0.087   | 11.6 | 3 |
| Galapagos sea lion | 22 | 0.2761  | 126.9129 | 0.1659  | -0.2208  | 4    | 3 |
| Galapagos sea lion | 22 | 0.1651  | 310.4479 | -0.1071 | 0.1256   | 25.3 | 3 |
| Galapagos sea lion | 22 | 3.6968  | 266.6374 | 0.2168  | 3.6905   | 5.7  | A |
| Galapagos sea lion | 22 | 1.5141  | 103.8768 | 0.3631  | -1.4699  | 10.8 | 1 |
| Galapagos sea lion | 22 | 0.1442  | 318.0762 | -0.1073 | 0.0963   | 7.5  | 1 |
| Galapagos sea lion | 22 | 0.0889  | 272.7662 | -0.0043 | 0.0888   | 9    | 3 |
| Galapagos sea lion | 22 | 13.1762 | 135.4153 | 9.3842  | -9.2492  | 1    | A |
| Galapagos sea lion | 22 | 0.8083  | 286.8964 | -0.2349 | 0.7734   | 15.7 | 1 |
| Galapagos sea lion | 22 | 0.4636  | 304.5947 | -0.2632 | 0.3817   | 2.4  | 1 |
| Galapagos sea lion | 22 | 0.2464  | 193.0404 | 0.2401  | 0.0556   | 0.6  | 2 |
| Galapagos sea lion | 22 | 1.086   | 195.1824 | 1.0481  | 0.2844   | 0.5  | 1 |
| Galapagos sea lion | 22 | 0.6652  | 136.0193 | 0.4786  | -0.4619  | 11.6 | A |
| Galapagos sea lion | 22 | 1.02    | 99.0644  | 0.1607  | -1.0073  | 11.7 | 1 |
| Galapagos sea lion | 22 | 0.3152  | 127.193  | 0.1906  | -0.2511  | 3.8  | 1 |
| Galapagos sea lion | 22 | 0.8593  | 201.5339 | 0.7993  | 0.3154   | 0.4  | 1 |
| Galapagos sea lion | 22 | 1.0549  | 251.51   | 0.3345  | 1.0004   | 0.3  | 1 |
| Galapagos sea lion | 22 | 0.0796  | 78.1794  | -0.0163 | -0.0779  | 10.7 | 2 |
| Galapagos sea lion | 22 | 8.4261  | 109.2545 | 2.7786  | -7.9548  | 5.8  | A |
| Galapagos sea lion | 22 | 0.1895  | 304.1869 | -0.1065 | 0.1567   | 13   | A |
| Galapagos sea lion | 22 | 7.0076  | 304.5001 | -3.9692 | 5.7751   | 0.4  | A |
| Galapagos sea lion | 22 | 0.1722  | 179.4362 | 0.1722  | -0.0017  | 8.4  | 2 |
| Galapagos sea lion | 22 | 4.7704  | 12.694   | -4.6538 | -1.0483  | 10.7 | 0 |
| Galapagos sea lion | 22 | 0.6029  | 33.2757  | -0.5041 | -0.3308  | 2.7  | 2 |
| Galapagos sea lion | 22 | 0.232   | 118.0933 | 0.1093  | -0.2047  | 0.8  | 2 |
| Galapagos sea lion | 22 | 0.4168  | 227.8633 | 0.2796  | 0.3091   | 1    | 2 |
| Galapagos sea lion | 22 | 1.4057  | 352.2686 | -1.3929 | 0.1891   | 5.6  | 0 |
| Galapagos sea lion | 22 | 0.2153  | 292.9451 | -0.0839 | 0.1983   | 4.3  | 1 |
| Galapagos sea lion | 22 | 0.835   | 298.9408 | -0.4041 | 0.7308   | 0.5  | 1 |
| Galapagos sea lion | 22 | 0.6775  | 49.7659  | -0.4376 | -0.5172  | 3.4  | 3 |
| Galapagos sea lion | 22 | 4.8242  | 114.9841 | 2.0375  | -4.3727  | 3.6  | A |
| Galapagos sea lion | 22 | 1.6757  | 277.347  | -0.2143 | 1.6619   | 0.8  | 0 |
| Galapagos sea lion | 22 | 0.5174  | 107.812  | 0.1583  | -0.4926  | 1.2  | 2 |

| <u>Species</u>      | <u>Animal ID</u> | <u>error (km)</u> | <u>angle</u> | <u>at error(km)</u> | <u>n error (km)</u> | <u>PS residu</u> | <u>ARGOS LC</u> |
|---------------------|------------------|-------------------|--------------|---------------------|---------------------|------------------|-----------------|
| California sea lion | 7                | 2.2423            | 295.3506     | -0.9598             | 2.0264              | 12.1             | 1               |
| California sea lion | 7                | 3.066             | 56.6638      | -1.6846             | -2.5615             | 19.7             | 0               |
| California sea lion | 7                | 0.7138            | 240.9711     | 0.3464              | 0.6241              | 8.5              | 1               |
| California sea lion | 7                | 0.419             | 111.1953     | 0.1515              | -0.3906             | 1.4              | 2               |
| California sea lion | 7                | 0.8812            | 223.0179     | 0.6443              | 0.6012              | 9.9              | 1               |
| California sea lion | 7                | 0.513             | 145.867      | 0.4247              | -0.2879             | 2.1              | 1               |
| California sea lion | 7                | 1.985             | 292.8873     | -0.7718             | 1.8288              | 13.3             | 1               |
| California sea lion | 7                | 0.9073            | 75.9993      | -0.2195             | -0.8804             | 7.8              | 2               |
| California sea lion | 7                | 2.0571            | 280.488      | -0.3742             | 2.0227              | 13.8             | 1               |
| California sea lion | 7                | 0.9839            | 232.5387     | 0.5985              | 0.781               | 24.4             | 2               |
| California sea lion | 7                | 1.1768            | 93.7914      | 0.0779              | -1.1742             | 8.1              | 0               |
| California sea lion | 7                | 0.3327            | 44.5481      | -0.2371             | -0.2334             | 1                | 2               |
| California sea lion | 7                | 0.7151            | 358.3018     | -0.7148             | 0.0212              | 8.2              | B               |
| California sea lion | 7                | 0.1673            | 117.6282     | 0.0776              | -0.1482             | 12.3             | 1               |
| California sea lion | 7                | 0.9481            | 247.5129     | 0.3627              | 0.876               | 17.8             | 1               |
| California sea lion | 7                | 2.4237            | 214.9086     | 1.9877              | 1.387               | 0.8              | B               |
| California sea lion | 7                | 0.5921            | 124.3365     | 0.334               | -0.4889             | 9.8              | 1               |
| California sea lion | 7                | 0.3063            | 108.8633     | 0.099               | -0.2898             | 10               | 1               |
| California sea lion | 7                | 0.0624            | 178.8755     | 0.0624              | -0.0012             | 1.4              | 1               |
| California sea lion | 7                | 28.4839           | 89.1378      | -0.385              | -28.4807            | 29.5             | A               |
| California sea lion | 7                | 0.2574            | 100.55       | 0.0471              | -0.253              | 4.5              | 1               |
| California sea lion | 7                | 0.9529            | 274.5128     | -0.0749             | 0.95                | 20               | 1               |
| California sea lion | 7                | 2.0657            | 268.5772     | 0.0515              | 2.0651              | 9.5              | 1               |
| California sea lion | 7                | 1.1558            | 161.2515     | 1.0945              | -0.3715             | 6.4              | B               |
| California sea lion | 7                | 2.2609            | 67.7406      | -0.8562             | -2.0924             | 1.8              | B               |
| California sea lion | 7                | 4.978             | 17.9791      | -4.7348             | -1.5366             | 12.7             | B               |
| California sea lion | 7                | 3.4563            | 293.818      | -1.3953             | 3.162               | 11.8             | 0               |
| California sea lion | 7                | 2.2036            | 273.8207     | -0.1466             | 2.1987              | 14.3             | A               |
| California sea lion | 7                | 0.6479            | 322.3285     | -0.5128             | 0.3959              | 28.1             | 0               |
| California sea lion | 7                | 11.234            | 65.2257      | -4.702              | -10.2001            | 7                | A               |
| California sea lion | 7                | 1.2373            | 266.2388     | 0.0812              | 1.2346              | 14.8             | 0               |
| California sea lion | 7                | 0.1577            | 230.9226     | 0.0994              | 0.1224              | 1.8              | 2               |
| California sea lion | 7                | 2.4915            | 268.9877     | 0.0443              | 2.4911              | 12.8             | 0               |
| California sea lion | 7                | 1.1868            | 316.7438     | -0.8643             | 0.8133              | 14.8             | A               |
| California sea lion | 7                | 1.8096            | 256.0108     | 0.4376              | 1.7559              | 15.2             | 1               |
| California sea lion | 7                | 0.2152            | 144.1725     | 0.1745              | -0.126              | 3                | 2               |
| California sea lion | 7                | 0.6291            | 227.722      | 0.4232              | 0.4655              | 0.6              | 2               |
| California sea lion | 7                | 1.2317            | 153.1302     | 1.0988              | -0.5567             | 18.3             | 2               |
| California sea lion | 7                | 5.0568            | 119.8006     | 2.5141              | -4.3881             | 1.6              | 1               |
| California sea lion | 7                | 4.334             | 255.2997     | 1.1008              | 4.1921              | 9.1              | A               |
| California sea lion | 7                | 2.0626            | 42.3225      | -1.5249             | -1.3888             | 12               | 1               |
| California sea lion | 7                | 0.1973            | 101.9        | 0.0407              | -0.193              | 20.8             | 1               |
| California sea lion | 7                | 0.3738            | 205.4385     | 0.3376              | 0.1606              | 8.1              | 1               |
| California sea lion | 7                | 1.607             | 76.9008      | -0.3641             | -1.5652             | 8.6              | 0               |
| California sea lion | 7                | 1.2325            | 91.4496      | 0.0313              | -1.2321             | 11.4             | 0               |
| California sea lion | 7                | 0.2192            | 220.9509     | 0.1656              | 0.1437              | 5.8              | 2               |
| California sea lion | 7                | 0.4829            | 237.2666     | 0.2611              | 0.4062              | 0.5              | 0               |
| California sea lion | 7                | 0.6331            | 158.379      | 0.5885              | -0.2333             | 0.2              | B               |
| California sea lion | 7                | 6.6219            | 65.34        | -2.7609             | -6.0179             | 14.7             | B               |
| California sea lion | 7                | 0.4043            | 82.4864      | -0.0529             | -0.4008             | 5.4              | 3               |
| California sea lion | 7                | 2.8325            | 246.6892     | 1.1212              | 2.6013              | 5.5              | 1               |

|                     |   |         |          |          |          |      |   |
|---------------------|---|---------|----------|----------|----------|------|---|
| California sea lion | 7 | 0.616   | 218.1068 | 0.4847   | 0.3802   | 23.2 | 1 |
| California sea lion | 7 | 8.1405  | 346.4034 | -7.9122  | 1.9137   | 10.2 | 0 |
| California sea lion | 7 | 1.7154  | 45.8542  | -1.1947  | -1.231   | 28.9 | A |
| California sea lion | 7 | 0.3094  | 233.1756 | 0.1855   | 0.2477   | 19   | B |
| California sea lion | 7 | 0.9522  | 106.7863 | 0.275    | -0.9116  | 21.8 | 1 |
| California sea lion | 7 | 0.87    | 80.3135  | -0.1463  | -0.8576  | 6.4  | 3 |
| California sea lion | 7 | 1.7873  | 245.4031 | 0.7441   | 1.6251   | 11.6 | 1 |
| California sea lion | 7 | 3.1916  | 204.9345 | 2.8942   | 1.3455   | 11.5 | B |
| California sea lion | 7 | 0.2459  | 95.1955  | 0.0223   | -0.2449  | 32.8 | 1 |
| California sea lion | 7 | 60.6347 | 251.293  | 19.625   | 57.4316  | 0.2  | Z |
| California sea lion | 7 | 0.9984  | 275.8138 | -0.1011  | 0.9933   | 24.5 | 1 |
| California sea lion | 7 | 2.2001  | 351.1653 | -2.174   | 0.3379   | 0.2  | 0 |
| California sea lion | 7 | 1.3402  | 300.4671 | -0.6794  | 1.1551   | 3.3  | 1 |
| California sea lion | 7 | 1.8359  | 77.8682  | -0.3857  | -1.7949  | 0.5  | 1 |
| California sea lion | 7 | 0.0911  | 9.6299   | -0.0899  | -0.0152  | 2.9  | 2 |
| California sea lion | 7 | 1.265   | 209.185  | 1.1044   | 0.6168   | 4.4  | 0 |
| California sea lion | 7 | 0.3663  | 148.1633 | 0.3112   | -0.1932  | 2.4  | 0 |
| California sea lion | 7 | 0.4867  | 34.8294  | -0.3995  | -0.2779  | 0.6  | 1 |
| California sea lion | 7 | 15.5391 | 226.0777 | 10.786   | 11.1925  | 8.2  | B |
| California sea lion | 7 | 0.381   | 161.1398 | 0.3606   | -0.1232  | 4.5  | 2 |
| California sea lion | 7 | 0.9969  | 48.557   | -0.6598  | -0.7473  | 6.8  | 0 |
| California sea lion | 7 | 2.2149  | 196.7409 | 2.121    | 0.638    | 3.8  | A |
| California sea lion | 7 | 0.2447  | 259.8206 | 0.0433   | 0.2409   | 0.1  | 1 |
| California sea lion | 7 | 1.0117  | 11.6339  | -0.9909  | -0.204   | 18   | 2 |
| California sea lion | 7 | 2.1839  | 66.2678  | -0.8787  | -1.9992  | 16.7 | B |
| California sea lion | 7 | 61.1    | 62.1004  | -28.4343 | -53.9983 | 9    | B |
| California sea lion | 7 | 0.3736  | 308.0453 | -0.2302  | 0.2942   | 27.1 | 2 |
| California sea lion | 7 | 5.2535  | 350.1549 | -5.1761  | 0.8983   | 4.3  | B |
| California sea lion | 7 | 1.8566  | 127.8137 | 1.1384   | -1.4668  | 19.6 | A |
| California sea lion | 7 | 1.4785  | 223.6743 | 1.0694   | 1.021    | 4.7  | 2 |
| California sea lion | 7 | 2.946   | 185.7453 | 2.9312   | 0.2949   | 3.9  | B |
| California sea lion | 7 | 2.0065  | 198.4292 | 1.9036   | 0.6343   | 17.7 | 0 |
| California sea lion | 7 | 0.6483  | 232.1882 | 0.3975   | 0.5122   | 16   | 1 |
| California sea lion | 8 | 0.0273  | 164.7459 | 0.0264   | -0.0072  | 2.3  | 3 |
| California sea lion | 8 | 1.9069  | 241.3601 | 0.9141   | 1.6736   | 4.5  | 1 |
| California sea lion | 8 | 0.7116  | 175.0872 | 0.709    | -0.0609  | 14.3 | A |
| California sea lion | 8 | 1.1137  | 64.0986  | -0.4864  | -1.0018  | 1.9  | 0 |
| California sea lion | 8 | 5.9367  | 305.2849 | -3.4281  | 4.8461   | 1.1  | B |
| California sea lion | 8 | 14.2383 | 320.9295 | -11.05   | 8.974    | 8.2  | A |
| California sea lion | 8 | 1.3709  | 99.6806  | 0.2306   | -1.3514  | 17.7 | 1 |
| California sea lion | 8 | 6.1645  | 258.4263 | 1.2387   | 6.0392   | 13.8 | B |
| California sea lion | 8 | 1.5385  | 47.6318  | -1.0367  | -1.1367  | 5.4  | 1 |
| California sea lion | 8 | 12.5709 | 322.1786 | -9.927   | 7.7085   | 21.9 | A |
| California sea lion | 8 | 1.2996  | 183.4025 | 1.2974   | 0.0771   | 12.8 | 0 |
| California sea lion | 8 | 1.31    | 199.0727 | 1.2381   | 0.4281   | 3.6  | 2 |
| California sea lion | 8 | 5.8519  | 346.5367 | -5.6909  | 1.3624   | 9.2  | 0 |
| California sea lion | 8 | 0.6692  | 184.3906 | 0.6672   | 0.0512   | 10.1 | 2 |
| California sea lion | 8 | 15.6762 | 252.9528 | 4.6074   | 14.9875  | 10.5 | B |
| California sea lion | 8 | 0.6405  | 265.1871 | 0.0538   | 0.6382   | 10.8 | 1 |
| California sea lion | 8 | 0.4092  | 267.7777 | 0.0159   | 0.4089   | 6.8  | B |
| California sea lion | 8 | 0.5143  | 158.7004 | 0.4791   | -0.1868  | 5.2  | 1 |
| California sea lion | 8 | 0.2745  | 250.1734 | 0.0931   | 0.2582   | 7.1  | 1 |

|                     |   |         |          |         |          |      |   |
|---------------------|---|---------|----------|---------|----------|------|---|
| California sea lion | 8 | 0.8251  | 262.4683 | 0.1082  | 0.818    | 8    | 0 |
| California sea lion | 8 | 2.3069  | 153.9573 | 2.0727  | -1.0128  | 12.3 | 0 |
| California sea lion | 8 | 1.3626  | 131.1714 | 0.897   | -1.0257  | 12.1 | 1 |
| California sea lion | 8 | 0.3583  | 276.3847 | -0.0398 | 0.3561   | 9.1  | 0 |
| California sea lion | 8 | 0.8888  | 108.495  | 0.282   | -0.8429  | 19.5 | 1 |
| California sea lion | 8 | 1.0889  | 255.5595 | 0.2716  | 1.0545   | 13.1 | 3 |
| California sea lion | 8 | 0.3823  | 58.4739  | -0.1999 | -0.3259  | 19.9 | 2 |
| California sea lion | 8 | 2.8546  | 137.0868 | 2.0909  | -1.9437  | 5.5  | B |
| California sea lion | 8 | 1.8422  | 120.0607 | 0.9229  | -1.5944  | 9.2  | 1 |
| California sea lion | 8 | 18.6556 | 146.1267 | 15.4948 | -10.3978 | 7.4  | B |
| California sea lion | 8 | 0.5226  | 270.8791 | -0.008  | 0.5225   | 5.4  | 1 |
| California sea lion | 8 | 6.6907  | 290.0371 | -2.2904 | 6.2857   | 11.1 | B |
| California sea lion | 8 | 1.3994  | 275.1077 | -0.1245 | 1.3939   | 9.5  | 0 |
| California sea lion | 8 | 1.1668  | 283.7006 | -0.2763 | 1.1336   | 22.9 | 0 |
| California sea lion | 8 | 9.2294  | 259.0727 | 1.7538  | 9.062    | 10.3 | 0 |
| California sea lion | 8 | 0.4859  | 356.4718 | -0.4849 | 0.0299   | 11.9 | 1 |
| California sea lion | 8 | 0.3234  | 299.2469 | -0.158  | 0.2821   | 0.7  | 1 |
| California sea lion | 8 | 0.4883  | 146.9059 | 0.4091  | -0.2666  | 14.5 | 1 |
| California sea lion | 8 | 0.4572  | 150.5841 | 0.3983  | -0.2246  | 14.8 | 2 |
| California sea lion | 8 | 11.5517 | 265.126  | 0.9884  | 11.5099  | 4.7  | B |
| California sea lion | 8 | 0.8782  | 5.5243   | -0.8741 | -0.0845  | 3.5  | A |
| California sea lion | 8 | 2.1517  | 182.0615 | 2.1503  | 0.0774   | 17.7 | 1 |
| California sea lion | 8 | 2.7997  | 148.612  | 2.3901  | -1.4581  | 11.4 | A |
| California sea lion | 8 | 6.7248  | 106.6978 | 1.9344  | -6.4412  | 16.1 | 0 |
| California sea lion | 8 | 38.3201 | 281.0268 | -7.2551 | 37.6127  | 22.9 | A |
| California sea lion | 8 | 0.5813  | 251.1217 | 0.1881  | 0.5501   | 0.8  | 2 |
| California sea lion | 8 | 2.4137  | 68.7959  | -0.8728 | -2.2503  | 8.8  | 0 |
| California sea lion | 8 | 1.8866  | 188.7652 | 1.8645  | 0.2875   | 12.2 | 1 |
| California sea lion | 8 | 0.6053  | 127.7479 | 0.3706  | -0.4786  | 5.6  | 2 |
| California sea lion | 8 | 0.4267  | 278.9739 | -0.0666 | 0.4215   | 24.5 | 1 |
| California sea lion | 8 | 0.5978  | 31.5084  | -0.5097 | -0.3124  | 5.1  | 1 |
| California sea lion | 8 | 0.9462  | 296.5499 | -0.4229 | 0.8464   | 18.2 | A |
| California sea lion | 8 | 0.2498  | 131.4804 | 0.1655  | -0.1872  | 9.5  | 1 |
| California sea lion | 8 | 1.5307  | 298.3286 | -0.7263 | 1.3474   | 15   | 0 |
| California sea lion | 8 | 0.1746  | 218.7972 | 0.1361  | 0.1094   | 15.2 | 2 |
| California sea lion | 8 | 2.1191  | 20.7404  | -1.9818 | -0.7505  | 0.2  | 1 |
| California sea lion | 8 | 2.3638  | 91.1071  | 0.046   | -2.3633  | 2.9  | 0 |
| California sea lion | 8 | 7.364   | 284.9568 | -1.8979 | 7.1145   | 11.3 | A |
| California sea lion | 8 | 0.3475  | 98.4887  | 0.0513  | -0.3437  | 9.9  | 1 |
| California sea lion | 8 | 1.5227  | 252.6739 | 0.4536  | 1.4536   | 17.8 | 1 |
| California sea lion | 8 | 0.6337  | 299.8062 | -0.315  | 0.5499   | 2    | 1 |
| California sea lion | 8 | 1.7721  | 238.7606 | 0.9192  | 1.5152   | 4.3  | 2 |
| California sea lion | 8 | 1.5023  | 35.7436  | -1.2193 | -0.8776  | 8.8  | 1 |
| California sea lion | 8 | 1.0345  | 315.8634 | -0.7424 | 0.7204   | 4.3  | 1 |
| California sea lion | 8 | 1.8807  | 344.9433 | -1.8161 | 0.4886   | 2.1  | B |
| California sea lion | 9 | 3.0106  | 264.8577 | 0.2703  | 2.9985   | 5.1  | 0 |
| California sea lion | 9 | 1.2355  | 74.0917  | -0.3386 | -1.1882  | 14.2 | 1 |
| California sea lion | 9 | 12.5663 | 264.438  | 1.2261  | 12.5072  | 0.2  | 0 |
| California sea lion | 9 | 15.0341 | 263.4394 | 1.7294  | 14.9356  | 0.2  | 0 |
| California sea lion | 9 | 0.0545  | 20.7926  | -0.0509 | -0.0193  | 6.3  | 1 |
| California sea lion | 9 | 1.4779  | 81.2687  | -0.2242 | -1.4608  | 4.2  | 1 |
| California sea lion | 9 | 0.4879  | 120.9925 | 0.2513  | -0.4183  | 4.7  | 1 |

|                     |   |         |          |          |         |      |   |
|---------------------|---|---------|----------|----------|---------|------|---|
| California sea lion | 9 | 1.7375  | 192.0813 | 1.6991   | 0.3637  | 1.4  | A |
| California sea lion | 9 | 0.2641  | 85.8896  | -0.0189  | -0.2634 | 0.5  | 1 |
| California sea lion | 9 | 2.2221  | 202.1227 | 2.0585   | 0.8368  | 4.1  | 2 |
| California sea lion | 9 | 3.5366  | 49.3872  | -2.3017  | -2.6847 | 0.8  | 0 |
| California sea lion | 9 | 2.6902  | 269.9309 | 0.0036   | 2.6902  | 0.5  | B |
| California sea lion | 9 | 0.6923  | 12.1122  | -0.6769  | -0.1453 | 14   | 1 |
| California sea lion | 9 | 0.5682  | 324.1594 | -0.4606  | 0.3327  | 8.9  | 1 |
| California sea lion | 9 | 42.9971 | 261.3779 | 6.5406   | 42.5113 | 1.1  | B |
| California sea lion | 9 | 14.9186 | 22.1784  | -13.8132 | -5.6317 | 6.2  | B |
| California sea lion | 9 | 1.3716  | 235.5462 | 0.776    | 1.131   | 6.7  | 0 |
| California sea lion | 9 | 4.1402  | 349.1015 | -4.0655  | 0.7828  | 4.1  | B |
| California sea lion | 9 | 1.6784  | 295.0938 | -0.7117  | 1.52    | 0.4  | 1 |
| California sea lion | 9 | 1.4785  | 249.6964 | 0.5131   | 1.3867  | 3.9  | 1 |
| California sea lion | 9 | 0.3225  | 102.4297 | 0.0694   | -0.3149 | 5.2  | 0 |
| California sea lion | 9 | 1.3641  | 244.6841 | 0.5834   | 1.2331  | 1.8  | 1 |
| California sea lion | 9 | 8.7691  | 185.4664 | 8.7293   | 0.8354  | 17.8 | B |
| California sea lion | 9 | 0.4248  | 83.329   | -0.0493  | -0.4219 | 2.2  | 1 |
| California sea lion | 9 | 21.3841 | 301.9007 | -11.2832 | 18.1544 | 7.2  | B |
| California sea lion | 9 | 1.4132  | 341.721  | -1.3419  | 0.4432  | 0.2  | 0 |
| California sea lion | 9 | 1.4864  | 12.2417  | -1.4526  | -0.3152 | 0.6  | 0 |
| California sea lion | 9 | 1.7763  | 284.2849 | -0.4381  | 1.7214  | 0.1  | B |
| California sea lion | 9 | 1.5111  | 194.6443 | 1.462    | 0.382   | 18.1 | 1 |
| California sea lion | 9 | 1.7263  | 290.6864 | -0.6097  | 1.615   | 0.1  | 0 |
| California sea lion | 9 | 0.1423  | 347.3379 | -0.1388  | 0.0312  | 0.1  | 2 |
| California sea lion | 9 | 1.4762  | 121.2473 | 0.7658   | -1.262  | 19.6 | 1 |
| California sea lion | 9 | 10.6075 | 113.5645 | 4.2456   | -9.7229 | 10.1 | B |
| California sea lion | 9 | 3.9174  | 67.9953  | -1.4671  | -3.632  | 4.4  | 0 |
| California sea lion | 9 | 1.4201  | 28.8171  | -1.2442  | -0.6845 | 17.9 | 0 |
| California sea lion | 9 | 1.5764  | 59.7106  | -0.795   | -1.3612 | 17.9 | 0 |
| California sea lion | 9 | 1.3085  | 235.6849 | 0.7377   | 1.0808  | 1    | 1 |
| California sea lion | 9 | 1.6045  | 95.6268  | 0.1575   | -1.5968 | 0.8  | 2 |
| California sea lion | 9 | 5.5347  | 8.9619   | -5.4671  | -0.8622 | 38   | B |
| California sea lion | 9 | 6.4113  | 271.8371 | -0.2034  | 6.408   | 0.3  | 0 |
| California sea lion | 9 | 0.617   | 15.8622  | -0.5935  | -0.1686 | 24.5 | 1 |
| California sea lion | 9 | 10.8328 | 205.8049 | 9.7538   | 4.7156  | 6.4  | 0 |
| California sea lion | 9 | 9.1334  | 14.8979  | -8.8261  | -2.3482 | 5.5  | 0 |
| California sea lion | 9 | 0.4427  | 131.4006 | 0.2928   | -0.3321 | 15.5 | 1 |
| California sea lion | 9 | 0.8581  | 36.8136  | -0.687   | -0.5142 | 0.5  | 1 |
| California sea lion | 9 | 1.4793  | 214.9017 | 1.2133   | 0.8464  | 0.2  | 2 |
| California sea lion | 9 | 3.0896  | 356.1113 | -3.0825  | 0.2095  | 60.8 | 1 |
| California sea lion | 9 | 6.2088  | 283.7019 | -1.4688  | 6.0322  | 2.6  | 1 |
| California sea lion | 9 | 4.9928  | 215.7395 | 4.053    | 2.9163  | 12.6 | A |
| California sea lion | 9 | 0.5036  | 198.4959 | 0.4776   | 0.1598  | 0.8  | 2 |
| California sea lion | 9 | 1.2875  | 161.4722 | 1.2208   | -0.4091 | 7.8  | 0 |
| California sea lion | 9 | 1.2553  | 47.6644  | -0.8454  | -0.9279 | 0.8  | 0 |
| California sea lion | 9 | 5.4304  | 77.8092  | -1.1453  | -5.308  | 23.1 | 0 |
| California sea lion | 9 | 2.0393  | 335.0743 | -1.8493  | 0.8595  | 9    | A |
| California sea lion | 9 | 1.3411  | 69.6248  | -0.4668  | -1.2571 | 7.1  | 2 |
| California sea lion | 9 | 1.2409  | 303.8193 | -0.6906  | 1.0309  | 1.3  | 2 |
| California sea lion | 9 | 1.094   | 292.4631 | -0.418   | 1.011   | 17   | 1 |
| California sea lion | 9 | 1.8168  | 51.0402  | -1.1422  | -1.4127 | 11.1 | 0 |
| California sea lion | 9 | 0.3348  | 208.5658 | 0.294    | 0.1601  | 15.4 | 1 |

|                     |    |        |          |         |         |      |   |
|---------------------|----|--------|----------|---------|---------|------|---|
| California sea lion | 9  | 1.2858 | 255.6395 | 0.319   | 1.2456  | 0.4  | 2 |
| California sea lion | 9  | 4.5456 | 352.5562 | -4.5072 | 0.5889  | 0.4  | 0 |
| California sea lion | 9  | 0.7288 | 15.4683  | -0.7024 | -0.1944 | 1.9  | 1 |
| California sea lion | 10 | 0.2448 | 154.4174 | 0.2208  | -0.1057 | 8.6  | 0 |
| California sea lion | 10 | 0.5054 | 270.2067 | -0.0018 | 0.5054  | 18.7 | 1 |
| California sea lion | 10 | 0.7608 | 241.7136 | 0.3606  | 0.67    | 20.5 | 2 |
| California sea lion | 10 | 0.7787 | 128.0325 | 0.4798  | -0.6134 | 7.7  | 1 |
| California sea lion | 10 | 0.6902 | 81.1952  | -0.1056 | -0.682  | 35.8 | 1 |
| California sea lion | 10 | 1.7911 | 297.5156 | -0.8273 | 1.5885  | 8.8  | A |
| California sea lion | 10 | 1.7834 | 117.4708 | 0.8228  | -1.5823 | 5.5  | A |
| California sea lion | 10 | 1.107  | 240.2533 | 0.5493  | 0.9611  | 1.7  | A |
| California sea lion | 10 | 0.7099 | 121.5058 | 0.371   | -0.6053 | 10.9 | 1 |
| California sea lion | 10 | 0.8105 | 21.1261  | -0.756  | -0.2921 | 10.9 | A |
| California sea lion | 10 | 1.0984 | 270.7075 | -0.0135 | 1.0983  | 5.5  | B |
| California sea lion | 10 | 4.169  | 278.2608 | -0.5981 | 4.1258  | 10   | 0 |
| California sea lion | 10 | 0.3389 | 16.0629  | -0.3256 | -0.0938 | 1    | 1 |
| California sea lion | 10 | 0.3033 | 33.9157  | -0.2517 | -0.1693 | 17.8 | 1 |
| California sea lion | 10 | 0.3029 | 214.5645 | 0.2494  | 0.1718  | 13.1 | 2 |
| California sea lion | 10 | 3.5243 | 72.5031  | -1.059  | -3.3613 | 6.4  | A |
| California sea lion | 10 | 0.0936 | 160.839  | 0.0884  | -0.0307 | 9.9  | 1 |
| California sea lion | 10 | 0.4878 | 204.3619 | 0.4444  | 0.2012  | 23.1 | A |
| California sea lion | 10 | 0.9044 | 257.8609 | 0.1902  | 0.8842  | 17.6 | 1 |
| California sea lion | 10 | 3.1197 | 153.1314 | 2.783   | -1.4099 | 8.4  | 0 |
| California sea lion | 10 | 0.8353 | 55.0113  | -0.4789 | -0.6843 | 5.5  | 1 |
| California sea lion | 10 | 0.2541 | 102.3075 | 0.0542  | -0.2483 | 9.2  | 0 |
| California sea lion | 10 | 2.5295 | 87.3748  | -0.1155 | -2.5268 | 0.3  | B |
| California sea lion | 10 | 1.4233 | 267.1226 | 0.0716  | 1.4215  | 18   | 0 |
| California sea lion | 10 | 1.7342 | 269.7535 | 0.0076  | 1.7342  | 14.1 | 1 |
| California sea lion | 10 | 0.4777 | 25.1868  | -0.4323 | -0.2033 | 8    | A |
| California sea lion | 10 | 0.1681 | 45.3125  | -0.1182 | -0.1195 | 0.4  | 2 |
| California sea lion | 10 | 2.1794 | 34.0682  | -1.8053 | -1.2209 | 13.4 | 0 |
| California sea lion | 10 | 0.4388 | 153.193  | 0.3917  | -0.1979 | 0.7  | 0 |
| California sea lion | 10 | 0.2288 | 194.3324 | 0.2217  | 0.0566  | 16.4 | 1 |
| California sea lion | 10 | 0.3747 | 77.044   | -0.084  | -0.3651 | 16.4 | 1 |
| California sea lion | 10 | 0.4488 | 36.2275  | -0.3621 | -0.2653 | 2.7  | 2 |
| California sea lion | 10 | 1.4033 | 272.7103 | -0.0663 | 1.4017  | 15.3 | A |
| California sea lion | 10 | 1.0442 | 239.2301 | 0.5342  | 0.8972  | 8.6  | 0 |
| California sea lion | 10 | 0.6015 | 176.5835 | 0.6004  | -0.0358 | 1.8  | 1 |
| California sea lion | 10 | 0.5022 | 196.1744 | 0.4823  | 0.1399  | 29.1 | A |
| California sea lion | 10 | 0.9134 | 107.7399 | 0.2783  | -0.87   | 20.4 | 1 |
| California sea lion | 10 | 0.9203 | 75.589   | -0.229  | -0.8914 | 21.1 | B |
| California sea lion | 10 | 1.151  | 13.9133  | -1.1172 | -0.2768 | 2.5  | A |
| California sea lion | 10 | 0.4494 | 25.0778  | -0.407  | -0.1905 | 12.8 | 0 |
| California sea lion | 10 | 1.5588 | 31.0625  | -1.3352 | -0.8043 | 16.6 | 1 |
| California sea lion | 10 | 0.7987 | 9.7276   | -0.7873 | -0.135  | 4.5  | 3 |
| California sea lion | 10 | 0.232  | 56.0575  | -0.1295 | -0.1924 | 1.2  | A |
| California sea lion | 10 | 2.4195 | 127.0849 | 1.4592  | -1.9302 | 14.3 | 2 |
| California sea lion | 10 | 2.5657 | 180.8686 | 2.5654  | 0.0389  | 0.3  | B |
| California sea lion | 10 | 0.7992 | 106.8396 | 0.2316  | -0.765  | 10   | 3 |
| California sea lion | 10 | 1.027  | 0.6587   | -1.0269 | -0.0118 | 10.3 | B |
| California sea lion | 10 | 1.118  | 183.6582 | 1.1157  | 0.0713  | 20.1 | A |
| California sea lion | 10 | 2.8924 | 52.5028  | -1.7604 | -2.2948 | 1.4  | B |

|                     |    |         |          |          |          |      |   |
|---------------------|----|---------|----------|----------|----------|------|---|
| California sea lion | 10 | 0.461   | 260.5476 | 0.0757   | 0.4547   | 5.6  | 2 |
| California sea lion | 10 | 0.4809  | 236.3903 | 0.2662   | 0.4005   | 17.1 | 1 |
| California sea lion | 10 | 0.7281  | 294.5816 | -0.3029  | 0.6621   | 0.2  | A |
| California sea lion | 10 | 0.6091  | 337.444  | -0.5625  | 0.2337   | 24.2 | 0 |
| California sea lion | 10 | 3.8397  | 135.1914 | 2.7246   | -2.706   | 12   | A |
| California sea lion | 10 | 0.3867  | 296.4387 | -0.1722  | 0.3462   | 0.3  | A |
| California sea lion | 10 | 0.2719  | 312.357  | -0.1832  | 0.2009   | 27.9 | 0 |
| California sea lion | 10 | 1.326   | 113.0194 | 0.5186   | -1.2204  | 7.4  | 2 |
| California sea lion | 10 | 24.1663 | 107.6507 | 7.3577   | -23.0287 | 2.6  | A |
| California sea lion | 10 | 2.0479  | 252.601  | 0.6126   | 1.9542   | 16.3 | 1 |
| California sea lion | 10 | 2.2444  | 19.3379  | -2.1177  | -0.7432  | 18.8 | B |
| California sea lion | 10 | 7.4356  | 292.8597 | -2.8862  | 6.8516   | 18.4 | B |
| California sea lion | 10 | 4.8963  | 21.934   | -4.5417  | -1.829   | 25.7 | A |
| California sea lion | 10 | 0.1284  | 287.2157 | -0.038   | 0.1226   | 25.4 | 1 |
| California sea lion | 10 | 0.9734  | 103.0884 | 0.2205   | -0.9482  | 17.8 | 1 |
| California sea lion | 10 | 5.5724  | 75.1664  | -1.4251  | -5.3867  | 12.8 | 0 |
| California sea lion | 10 | 49.2715 | 287.0803 | -14.3603 | 47.0985  | 3.8  | B |
| California sea lion | 10 | 0.9843  | 286.1478 | -0.2737  | 0.9454   | 0.1  | 1 |
| California sea lion | 10 | 7.9963  | 91.9549  | 0.276    | -7.9916  | 24.7 | A |
| California sea lion | 10 | 0.7072  | 83.4275  | -0.0809  | -0.7026  | 25.8 | 1 |
| California sea lion | 10 | 1.1428  | 36.683   | -0.9164  | -0.6827  | 19.4 | B |
| California sea lion | 10 | 3.4075  | 73.9903  | -0.9392  | -3.2753  | 0.4  | 2 |
| California sea lion | 10 | 0.6251  | 355.2511 | -0.623   | 0.0518   | 24.9 | B |
| California sea lion | 10 | 1.7735  | 109.2577 | 0.5851   | -1.6743  | 12   | 0 |
| California sea lion | 10 | 1.243   | 321.8757 | -0.9778  | 0.7674   | 16.6 | 1 |
| California sea lion | 10 | 2.8358  | 259.8536 | 0.5      | 2.7914   | 13.8 | B |
| California sea lion | 10 | 0.5025  | 196.7119 | 0.4812   | 0.1445   | 3.6  | B |
| California sea lion | 10 | 4.1571  | 340.2654 | -3.9128  | 1.4037   | 4.1  | A |
| California sea lion | 11 | 0.486   | 112.3665 | 0.185    | -0.4495  | 14.7 | 1 |
| California sea lion | 11 | 6.5284  | 86.0718  | -0.4449  | -6.5131  | 12.9 | 2 |
| California sea lion | 11 | 2.1271  | 13.7548  | -2.0661  | -0.5058  | 6.7  | 0 |
| California sea lion | 11 | 2.2553  | 46.8636  | -1.5419  | -1.6458  | 15.7 | A |
| California sea lion | 11 | 0.604   | 208.5081 | 0.5308   | 0.2883   | 5.2  | A |
| California sea lion | 11 | 3.4213  | 192.9679 | 3.3341   | 0.7678   | 7.5  | 0 |
| California sea lion | 11 | 0.4881  | 275.0358 | -0.0428  | 0.4862   | 11.9 | 1 |
| California sea lion | 11 | 4.7465  | 134.3068 | 3.316    | -3.3966  | 7.8  | B |
| California sea lion | 11 | 2.8177  | 94.7776  | 0.2351   | -2.8079  | 14.4 | B |
| California sea lion | 11 | 2.0991  | 262.454  | 0.2759   | 2.081    | 6.6  | 0 |
| California sea lion | 11 | 5.4293  | 154.4383 | 4.8982   | -2.3426  | 4.8  | 0 |
| California sea lion | 11 | 7.3846  | 286.4354 | -2.0868  | 7.0828   | 21.8 | 0 |
| California sea lion | 11 | 1.7016  | 143.6057 | 1.3697   | -1.0096  | 24.9 | B |
| California sea lion | 11 | 0.8169  | 238.4979 | 0.4269   | 0.6965   | 19   | 1 |
| California sea lion | 11 | 1.0005  | 138.253  | 0.7465   | -0.6662  | 15.6 | 0 |
| California sea lion | 11 | 17.185  | 106.8491 | 4.995    | -16.4473 | 22.1 | 0 |
| California sea lion | 11 | 1.1892  | 145.1308 | 0.9757   | -0.6799  | 17.4 | 1 |
| California sea lion | 11 | 3.3482  | 264.2895 | 0.3337   | 3.3315   | 13.1 | 0 |
| California sea lion | 11 | 0.2617  | 88.9541  | -0.0048  | -0.2616  | 18.6 | 1 |
| California sea lion | 11 | 1.4553  | 74.3921  | -0.3914  | -1.4016  | 4.2  | 0 |
| California sea lion | 11 | 7.8658  | 179.6108 | 7.8657   | -0.0534  | 13.6 | A |
| California sea lion | 11 | 3.1055  | 283.4624 | -0.7225  | 3.0201   | 2.7  | 0 |
| California sea lion | 11 | 1.1479  | 130.8194 | 0.7504   | -0.8687  | 10.7 | B |
| California sea lion | 11 | 10.8543 | 62.0351  | -5.0851  | -9.5869  | 3.7  | B |



|                     |    |          |          |         |          |      |   |
|---------------------|----|----------|----------|---------|----------|------|---|
| California sea lion | 11 | 21.1081  | 257.751  | 4.5008  | 20.6276  | 24.9 | A |
| California sea lion | 11 | 1.0912   | 98.2769  | 0.1572  | -1.0799  | 35.5 | 1 |
| California sea lion | 11 | 0.4057   | 12.0862  | -0.3967 | -0.0849  | 9.3  | 0 |
| California sea lion | 11 | 1.1379   | 304.3018 | -0.6412 | 0.94     | 20   | B |
| California sea lion | 11 | 1.0687   | 75.5342  | -0.2669 | -1.0349  | 9.8  | 1 |
| California sea lion | 11 | 2.1886   | 234.5007 | 1.271   | 1.7817   | 23.5 | 0 |
| California sea lion | 11 | 0.807    | 352.0166 | -0.7992 | 0.1121   | 11.6 | 1 |
| California sea lion | 11 | 0.8484   | 320.8933 | -0.6583 | 0.5351   | 10   | 1 |
| California sea lion | 11 | 0.6443   | 316.7879 | -0.4696 | 0.4411   | 1.9  | 2 |
| California sea lion | 11 | 9.9292   | 272.2504 | -0.3847 | 9.9216   | 14.7 | B |
| California sea lion | 11 | 1.1467   | 82.5211  | -0.1492 | -1.137   | 11.9 | 1 |
| California sea lion | 11 | 3.9763   | 182.3749 | 3.9729  | 0.1648   | 0.7  | 0 |
| California sea lion | 11 | 0.787    | 186.37   | 0.7822  | 0.0873   | 1.4  | 1 |
| California sea lion | 11 | 1.7003   | 241.4652 | 0.8123  | 1.4938   | 0.4  | B |
| California sea lion | 11 | 10.2766  | 104.6431 | 2.6031  | -9.9429  | 18.4 | B |
| California sea lion | 11 | 0.7213   | 71.4027  | -0.23   | -0.6837  | 0.3  | 1 |
| California sea lion | 11 | 1.0022   | 216.9189 | 0.8013  | 0.602    | 19   | 1 |
| California sea lion | 11 | 1.7375   | 257.1107 | 0.3877  | 1.6937   | 10.4 | 0 |
| California sea lion | 11 | 0.776    | 69.1491  | -0.2762 | -0.7252  | 6.2  | 1 |
| California sea lion | 11 | 1.4303   | 76.6866  | -0.3293 | -1.3919  | 10.4 | 1 |
| California sea lion | 11 | 0.4052   | 227.8789 | 0.2717  | 0.3005   | 12.1 | A |
| California sea lion | 11 | 0.6841   | 243.9201 | 0.3008  | 0.6145   | 13.6 | 1 |
| California sea lion | 11 | 1.4471   | 67.2083  | -0.5605 | -1.3341  | 7.2  | B |
| California sea lion | 11 | 39.0777  | 255.9297 | 9.5767  | 37.9054  | 13.8 | B |
| California sea lion | 11 | 5.7815   | 75.589   | -1.4372 | -5.5996  | 8.2  | B |
| California sea lion | 11 | 117.5395 | 222.8914 | 86.459  | 79.997   | 0.5  | Z |
| California sea lion | 11 | 0.9358   | 302.9271 | -0.5086 | 0.7855   | 15.5 | 0 |
| California sea lion | 11 | 0.2904   | 11.2282  | -0.2848 | -0.0565  | 7.1  | 0 |
| California sea lion | 11 | 2.5521   | 120.6384 | 1.3008  | -2.1958  | 16.3 | A |
| California sea lion | 11 | 32.702   | 74.1383  | -8.8871 | -31.4569 | 13.5 | 0 |
| California sea lion | 11 | 0.0905   | 115.5092 | 0.039   | -0.0816  | 5.4  | 3 |
| California sea lion | 11 | 10.5005  | 300.8781 | -5.3847 | 9.0122   | 20.9 | B |
| California sea lion | 11 | 5.081    | 146.1275 | 4.2191  | -2.8319  | 8.2  | A |
| California sea lion | 11 | 0.3536   | 98.9142  | 0.0548  | -0.3493  | 13.7 | 3 |
| California sea lion | 11 | 4.4034   | 76.498   | -1.0271 | -4.2817  | 11.3 | B |
| California sea lion | 11 | 7.0038   | 107.2729 | 2.082   | -6.688   | 20.6 | 0 |
| California sea lion | 11 | 1.9051   | 48.0446  | -1.2735 | -1.4167  | 6.8  | 2 |
| California sea lion | 12 | 1.6979   | 226.5978 | 1.1667  | 1.2336   | 27.5 | 1 |
| California sea lion | 12 | 7.0844   | 43.0184  | -5.1784 | -4.8332  | 0.3  | A |
| California sea lion | 12 | 8.4377   | 249.4088 | 2.9708  | 7.8987   | 10   | A |
| California sea lion | 12 | 1.2714   | 46.4092  | -0.8766 | -0.9209  | 0.3  | B |
| California sea lion | 12 | 0.5561   | 125.4598 | 0.3226  | -0.4529  | 8.5  | 1 |
| California sea lion | 12 | 10.7346  | 76.5982  | -2.4824 | -10.4422 | 0.1  | 0 |
| California sea lion | 12 | 10.8744  | 153.5589 | 9.738   | -4.8421  | 0.2  | B |
| California sea lion | 12 | 0.7199   | 65.817   | -0.2949 | -0.6567  | 3.7  | 0 |
| California sea lion | 12 | 1.5036   | 306.6599 | -0.8977 | 1.2062   | 0.9  | A |
| California sea lion | 12 | 1.6732   | 113.4429 | 0.6658  | -1.5351  | 23   | 1 |
| California sea lion | 12 | 0.5954   | 52.1541  | -0.3653 | -0.4702  | 0.1  | 1 |
| California sea lion | 12 | 0.4178   | 98.6801  | 0.0631  | -0.413   | 0.3  | 2 |
| California sea lion | 12 | 0.7815   | 344.6114 | -0.7534 | 0.2074   | 0.5  | 1 |
| California sea lion | 12 | 0.5501   | 331.7837 | -0.4847 | 0.2601   | 10   | 1 |
| California sea lion | 12 | 0.2438   | 287.3381 | -0.0727 | 0.2328   | 0.4  | 1 |

|                     |    |         |          |          |          |      |   |
|---------------------|----|---------|----------|----------|----------|------|---|
| California sea lion | 12 | 4.6705  | 78.1937  | -0.9545  | -4.5717  | 0.4  | 0 |
| California sea lion | 12 | 0.9856  | 259.2062 | 0.1846   | 0.9682   | 1.6  | 1 |
| California sea lion | 12 | 3.4003  | 2.5782   | -3.3969  | -0.153   | 0.3  | 2 |
| California sea lion | 12 | 1.0601  | 259.3835 | 0.1954   | 1.0419   | 10.5 | 2 |
| California sea lion | 12 | 0.6543  | 287.4479 | -0.1962  | 0.6242   | 3.8  | 1 |
| California sea lion | 12 | 0.8686  | 86.5822  | -0.0517  | -0.867   | 12.1 | 1 |
| California sea lion | 12 | 0.6531  | 89.3032  | -0.0079  | -0.6531  | 1.3  | 1 |
| California sea lion | 12 | 7.6968  | 121.2036 | 3.9898   | -6.5833  | 0.1  | A |
| California sea lion | 12 | 9.1779  | 276.3915 | -1.0174  | 9.1209   | 14.4 | 0 |
| California sea lion | 12 | 0.2417  | 84.1298  | -0.0247  | -0.2404  | 1    | 1 |
| California sea lion | 12 | 0.6485  | 281.9992 | -0.1348  | 0.6343   | 4.9  | 1 |
| California sea lion | 12 | 1.6946  | 114.581  | 0.7051   | -1.5411  | 0.3  | B |
| California sea lion | 12 | 0.3015  | 333.3251 | -0.2694  | 0.1354   | 13.5 | 2 |
| California sea lion | 12 | 1.8494  | 179.4411 | 1.8493   | -0.018   | 0.2  | A |
| California sea lion | 12 | 1.412   | 16.981   | -1.3504  | -0.4124  | 0.6  | 1 |
| California sea lion | 12 | 0.8652  | 270.0872 | -0.0013  | 0.8652   | 16.2 | 1 |
| California sea lion | 12 | 11.9257 | 79.065   | -2.2552  | -11.7092 | 0.3  | B |
| California sea lion | 12 | 1.6115  | 99.1805  | 0.2572   | -1.5909  | 4.5  | A |
| California sea lion | 12 | 15.0174 | 335.9202 | -13.7086 | 6.1272   | 15.4 | A |
| California sea lion | 12 | 1.441   | 248.1939 | 0.5354   | 1.3379   | 10.8 | 0 |
| California sea lion | 12 | 0.4469  | 315.0556 | -0.3163  | 0.3157   | 30.9 | 0 |
| California sea lion | 12 | 0.6288  | 91.4599  | 0.016    | -0.6286  | 14.3 | 3 |
| California sea lion | 12 | 0.9601  | 18.2827  | -0.9116  | -0.3012  | 13   | 1 |
| California sea lion | 12 | 1.2964  | 143.2808 | 1.0392   | -0.7751  | 0.8  | 1 |
| California sea lion | 12 | 0.3191  | 46.0759  | -0.2214  | -0.2299  | 5.2  | 1 |
| California sea lion | 12 | 0.6227  | 60.9076  | -0.3028  | -0.5442  | 5.2  | 0 |
| California sea lion | 12 | 0.6761  | 261.1959 | 0.1035   | 0.6681   | 3.8  | 2 |
| California sea lion | 12 | 1.0699  | 88.1017  | -0.0354  | -1.0693  | 0.4  | 1 |
| California sea lion | 12 | 4.818   | 293.575  | -1.9259  | 4.4158   | 1.5  | A |
| California sea lion | 12 | 0.3422  | 216.6022 | 0.2747   | 0.204    | 2.2  | 1 |
| California sea lion | 12 | 16.2668 | 73.3729  | -4.6423  | -15.5867 | 11   | B |
| California sea lion | 12 | 1.9835  | 67.1211  | -0.771   | -1.8275  | 18.6 | 1 |
| California sea lion | 12 | 1.141   | 281.3351 | -0.2242  | 1.1188   | 15.1 | 2 |
| California sea lion | 13 | 2.17    | 147.7924 | 1.8362   | -1.1566  | 1.5  | 0 |
| California sea lion | 13 | 1.215   | 202.9444 | 1.1189   | 0.4737   | 12.7 | 1 |
| California sea lion | 13 | 0.4084  | 72.9479  | -0.1198  | -0.3905  | 5.2  | 2 |
| California sea lion | 13 | 0.3221  | 66.3589  | -0.1291  | -0.295   | 13.3 | 1 |
| California sea lion | 13 | 0.5144  | 102.021  | 0.1072   | -0.5031  | 8.6  | 1 |
| California sea lion | 13 | 0.2901  | 34.8126  | -0.2382  | -0.1656  | 13.7 | 1 |
| California sea lion | 13 | 1.2664  | 9.867    | -1.2477  | -0.217   | 23.1 | 2 |
| California sea lion | 13 | 1.0544  | 141.1808 | 0.8215   | -0.661   | 8    | 1 |
| California sea lion | 13 | 90.9164 | 323.8458 | -73.2594 | 53.6361  | 31.7 | Z |
| California sea lion | 13 | 0.2039  | 161.0328 | 0.1928   | -0.0663  | 11   | 2 |
| California sea lion | 13 | 8.768   | 32.3563  | -7.4055  | -4.6925  | 7.9  | A |
| California sea lion | 13 | 0.0858  | 313.5291 | -0.0591  | 0.0622   | 17   | 2 |
| California sea lion | 13 | 8.3674  | 20.4751  | -7.8383  | -2.9269  | 24.7 | A |
| California sea lion | 13 | 1.5987  | 293.4612 | -0.6364  | 1.4665   | 10.4 | 0 |
| California sea lion | 13 | 0.5876  | 200.1791 | 0.5515   | 0.2027   | 0.5  | 2 |
| California sea lion | 13 | 0.6384  | 168.2137 | 0.625    | -0.1304  | 10.1 | A |
| California sea lion | 13 | 8.7074  | 132.7628 | 5.9142   | -6.3927  | 14.4 | B |
| California sea lion | 13 | 7.3637  | 107.9474 | 2.2716   | -7.0053  | 15.1 | B |
| California sea lion | 13 | 0.7959  | 262.526  | 0.1036   | 0.7891   | 26.6 | 1 |

|                     |    |        |          |         |         |      |   |
|---------------------|----|--------|----------|---------|---------|------|---|
| California sea lion | 13 | 0.4672 | 275.3704 | -0.0437 | 0.4652  | 8.2  | 1 |
| California sea lion | 13 | 0.4269 | 39.3275  | -0.3302 | -0.2706 | 18   | 1 |
| California sea lion | 13 | 0.2543 | 185.6187 | 0.253   | 0.0249  | 17.1 | 2 |
| California sea lion | 13 | 0.2097 | 113.6526 | 0.0841  | -0.1921 | 18.8 | 1 |
| California sea lion | 13 | 2.6251 | 98.1731  | 0.3735  | -2.5984 | 15.8 | 1 |
| California sea lion | 13 | 0.3522 | 241.9531 | 0.1656  | 0.3108  | 6.6  | 2 |
| California sea lion | 13 | 0.4988 | 59.7923  | -0.251  | -0.4311 | 13.6 | 2 |
| California sea lion | 13 | 0.7317 | 52.9304  | -0.4411 | -0.5839 | 1    | 1 |
| California sea lion | 13 | 0.7778 | 77.2108  | -0.1722 | -0.7585 | 11.8 | 2 |
| California sea lion | 13 | 0.7783 | 106.2639 | 0.218   | -0.7472 | 8.3  | 2 |
| California sea lion | 13 | 0.9642 | 269.2257 | 0.0131  | 0.9642  | 10.3 | 1 |
| California sea lion | 13 | 2.8915 | 80.8248  | -0.4606 | -2.8545 | 12.4 | 0 |
| California sea lion | 13 | 2.5456 | 251.8471 | 0.7934  | 2.4189  | 5.9  | B |
| California sea lion | 13 | 1.0085 | 249.7261 | 0.3495  | 0.9461  | 16.6 | 2 |
| California sea lion | 13 | 9.2206 | 280.0328 | -1.602  | 9.0796  | 0.5  | 0 |
| California sea lion | 13 | 3.7574 | 48.7544  | -2.4768 | -2.8251 | 10.1 | A |
| California sea lion | 13 | 0.6777 | 73.1103  | -0.1969 | -0.6485 | 8.2  | 2 |
| California sea lion | 13 | 2.9487 | 77.4518  | -0.6402 | -2.8783 | 14.5 | 0 |
| California sea lion | 13 | 2.1341 | 248.8832 | 0.769   | 1.9908  | 16.7 | 2 |
| California sea lion | 13 | 1.0906 | 62.2006  | -0.5086 | -0.9647 | 6.7  | 1 |
| California sea lion | 13 | 0.4987 | 235.0878 | 0.2854  | 0.4089  | 6.7  | 1 |
| California sea lion | 13 | 0.7734 | 15.3907  | -0.7457 | -0.2053 | 15.8 | 1 |
| California sea lion | 13 | 4.5041 | 325.8402 | -3.7267 | 2.5291  | 8.4  | 0 |
| California sea lion | 13 | 2.6086 | 176.8164 | 2.6046  | -0.1449 | 24.1 | 1 |
| California sea lion | 13 | 0.2539 | 143.7348 | 0.2047  | -0.1502 | 15   | A |
| California sea lion | 13 | 0.7612 | 86.9508  | -0.0405 | -0.7601 | 3.3  | 1 |
| California sea lion | 13 | 1.4935 | 254.9255 | 0.3885  | 1.4421  | 12.9 | 1 |
| California sea lion | 13 | 0.7893 | 70.5259  | -0.2631 | -0.7441 | 3.2  | 2 |
| California sea lion | 13 | 2.4073 | 246.9113 | 0.9443  | 2.2145  | 10.7 | A |
| California sea lion | 13 | 1.6412 | 189.2872 | 1.6197  | 0.2649  | 7.7  | 1 |
| California sea lion | 13 | 1.0795 | 225.671  | 0.7544  | 0.7722  | 10.2 | 2 |
| California sea lion | 13 | 0.6323 | 101.9394 | 0.1308  | -0.6187 | 5.1  | 1 |
| California sea lion | 13 | 1.7926 | 64.7108  | -0.7656 | -1.6208 | 17.6 | 1 |
| California sea lion | 13 | 0.6195 | 225.2174 | 0.4364  | 0.4397  | 9.8  | 1 |
| California sea lion | 13 | 4.9654 | 312.2685 | -3.3391 | 3.6744  | 5.6  | A |
| California sea lion | 13 | 0.2083 | 292.0427 | -0.0782 | 0.193   | 19.6 | 3 |
| California sea lion | 13 | 0.5247 | 186.1936 | 0.5216  | 0.0566  | 8.7  | 2 |
| California sea lion | 13 | 6.8943 | 78.2095  | -1.4063 | -6.7488 | 12   | B |
| California sea lion | 13 | 1.6086 | 40.2956  | -1.2269 | -1.0403 | 9.9  | B |
| California sea lion | 13 | 3.4393 | 296.1729 | -1.5165 | 3.0866  | 26.8 | A |
| California sea lion | 13 | 5.4527 | 200.4131 | 5.1105  | 1.9018  | 1    | B |
| California sea lion | 13 | 0.7676 | 55.3267  | -0.4367 | -0.6313 | 7.1  | 1 |
| California sea lion | 13 | 4.4889 | 264.093  | 0.463   | 4.4651  | 2.3  | B |
| California sea lion | 13 | 1.4458 | 190.9998 | 1.4193  | 0.2759  | 10.3 | 0 |
| California sea lion | 13 | 0.3012 | 239.2539 | 0.154   | 0.2589  | 6.3  | 0 |
| California sea lion | 13 | 0.6609 | 76.4973  | -0.1543 | -0.6426 | 17.5 | 1 |
| California sea lion | 13 | 0.4344 | 56.6593  | -0.2387 | -0.3629 | 12.8 | 1 |
| California sea lion | 13 | 2.4426 | 165.9872 | 2.37    | -0.5915 | 26   | 0 |
| California sea lion | 13 | 4.3006 | 354.88   | -4.2835 | 0.3838  | 0.2  | A |
| California sea lion | 13 | 0.2214 | 194.7402 | 0.2141  | 0.0563  | 9.9  | 1 |
| California sea lion | 13 | 8.8934 | 101.813  | 1.8246  | -8.705  | 4.7  | B |
| California sea lion | 13 | 2.238  | 226.2735 | 1.5471  | 1.6173  | 8.1  | A |

|                     |    |         |          |          |         |      |   |
|---------------------|----|---------|----------|----------|---------|------|---|
| California sea lion | 13 | 2.865   | 252.4224 | 0.8656   | 2.7313  | 7.2  | 0 |
| California sea lion | 13 | 9.1407  | 140.9473 | 7.1001   | -5.759  | 2.1  | 1 |
| California sea lion | 13 | 3.2874  | 357.3992 | -3.284   | 0.1492  | 15.1 | 1 |
| California sea lion | 13 | 1.8395  | 118.721  | 0.8841   | -1.6132 | 17.9 | A |
| California sea lion | 14 | 2.7264  | 102.1685 | 0.575    | -2.6651 | 23.9 | 1 |
| California sea lion | 14 | 4.8514  | 250.4177 | 1.6271   | 4.5708  | 13.6 | B |
| California sea lion | 14 | 0.5234  | 29.3085  | -0.4564  | -0.2562 | 21.2 | 2 |
| California sea lion | 14 | 1.9162  | 241.0302 | 0.9283   | 1.6764  | 12.9 | A |
| California sea lion | 14 | 1.7472  | 251.1934 | 0.5634   | 1.6539  | 1.3  | A |
| California sea lion | 14 | 3.7843  | 180.1107 | 3.7843   | 0.0073  | 0.5  | A |
| California sea lion | 14 | 1.4391  | 66.7391  | -0.5682  | -1.3221 | 18.7 | 1 |
| California sea lion | 14 | 1.6215  | 261.6957 | 0.2343   | 1.6045  | 7.8  | 1 |
| California sea lion | 14 | 3.927   | 175.2898 | 3.9137   | -0.3225 | 17.7 | 0 |
| California sea lion | 14 | 1.0658  | 296.7485 | -0.4796  | 0.9517  | 5.4  | 1 |
| California sea lion | 14 | 1.3479  | 138.2522 | 1.0057   | -0.8975 | 20.2 | 1 |
| California sea lion | 14 | 0.653   | 321.1626 | -0.5086  | 0.4095  | 15.4 | A |
| California sea lion | 14 | 6.792   | 281.7335 | -1.3789  | 6.6501  | 0.2  | 0 |
| California sea lion | 14 | 1.2369  | 282.0881 | -0.259   | 1.2095  | 8.2  | A |
| California sea lion | 14 | 0.5514  | 292.9584 | -0.2151  | 0.5077  | 8.5  | 1 |
| California sea lion | 14 | 0.5563  | 105.6992 | 0.1505   | -0.5356 | 3.9  | 2 |
| California sea lion | 14 | 0.9107  | 146.4664 | 0.7592   | -0.5031 | 5.2  | A |
| California sea lion | 14 | 0.9306  | 301.9623 | -0.4926  | 0.7895  | 1.6  | B |
| California sea lion | 14 | 0.7815  | 263.4149 | 0.0897   | 0.7763  | 0.9  | A |
| California sea lion | 14 | 21.5994 | 310.5747 | -14.0351 | 16.406  | 19.9 | B |
| California sea lion | 14 | 29.2384 | 236.3151 | 16.2476  | 24.3293 | 22.4 | B |
| California sea lion | 14 | 1.6734  | 16.8444  | -1.6016  | -0.4849 | 18.3 | B |
| California sea lion | 14 | 5.0908  | 111.6029 | 1.8755   | -4.7332 | 0.2  | 0 |
| California sea lion | 14 | 0.2172  | 95.5473  | 0.021    | -0.2161 | 7.2  | 2 |
| California sea lion | 14 | 0.4633  | 68.3839  | -0.1707  | -0.4307 | 15   | A |
| California sea lion | 14 | 0.2973  | 23.5839  | -0.2725  | -0.119  | 4.9  | 1 |
| California sea lion | 14 | 0.2864  | 3.0683   | -0.2859  | -0.0153 | 9.4  | 1 |
| California sea lion | 14 | 0.1127  | 202.6322 | 0.104    | 0.0433  | 18   | 2 |
| California sea lion | 14 | 1.388   | 114.4266 | 0.574    | -1.2637 | 11.8 | 1 |
| California sea lion | 14 | 0.2425  | 166.9186 | 0.2362   | -0.0549 | 30.2 | 1 |
| California sea lion | 14 | 1.2274  | 208.1169 | 1.0825   | 0.5784  | 0.3  | 1 |
| California sea lion | 14 | 2.1087  | 291.0032 | -0.7556  | 1.9686  | 13.7 | A |
| California sea lion | 14 | 0.4366  | 346.3652 | -0.4243  | 0.1029  | 13.7 | A |
| California sea lion | 14 | 0.4893  | 298.8422 | -0.236   | 0.4286  | 5.1  | 1 |
| California sea lion | 15 | 0.8308  | 295.513  | -0.3578  | 0.7498  | 9.8  | 1 |
| California sea lion | 15 | 1.3276  | 185.2217 | 1.3221   | 0.1208  | 2.5  | A |
| California sea lion | 15 | 2.1904  | 248.8923 | 0.789    | 2.0434  | 0.4  | 3 |
| California sea lion | 15 | 6.5347  | 164.8521 | 6.3078   | -1.7076 | 16.1 | B |
| California sea lion | 15 | 0.9818  | 142.9744 | 0.7839   | -0.5912 | 15.1 | A |
| California sea lion | 15 | 1.0133  | 303.5611 | -0.5601  | 0.8444  | 4    | A |
| California sea lion | 15 | 0.7772  | 235.5747 | 0.4394   | 0.6411  | 4.6  | 1 |
| California sea lion | 15 | 0.8235  | 13.0394  | -0.8023  | -0.1858 | 9.1  | B |
| California sea lion | 15 | 0.2493  | 212.1007 | 0.2112   | 0.1325  | 11.6 | 3 |
| California sea lion | 15 | 1.3676  | 35.6851  | -1.1108  | -0.7978 | 26.1 | A |
| California sea lion | 15 | 4.7979  | 109.9299 | 1.6365   | -4.5106 | 14.5 | B |
| California sea lion | 15 | 0.9785  | 216.6041 | 0.7856   | 0.5835  | 4.9  | 1 |
| California sea lion | 15 | 0.881   | 279.3925 | -0.1437  | 0.8692  | 1.5  | 1 |
| California sea lion | 15 | 14.121  | 42.1688  | -10.4613 | -9.4796 | 9.9  | B |

|                     |    |         |          |         |         |      |   |
|---------------------|----|---------|----------|---------|---------|------|---|
| California sea lion | 15 | 8.5616  | 257.9235 | 1.7949  | 8.3721  | 19.2 | 0 |
| California sea lion | 15 | 0.5225  | 199.4718 | 0.4926  | 0.1742  | 10.9 | 2 |
| California sea lion | 15 | 0.5119  | 319.6877 | -0.3903 | 0.3312  | 11.1 | 3 |
| California sea lion | 15 | 0.3303  | 215.4454 | 0.2691  | 0.1916  | 16.5 | 1 |
| California sea lion | 15 | 3.0474  | 352.6741 | -3.0225 | 0.3886  | 17.1 | 2 |
| California sea lion | 15 | 0.8766  | 37.9955  | -0.6908 | -0.5396 | 31.5 | 0 |
| California sea lion | 15 | 2.3643  | 172.838  | 2.3458  | -0.2948 | 4    | A |
| California sea lion | 15 | 0.894   | 256.8244 | 0.2038  | 0.8705  | 14.6 | B |
| California sea lion | 15 | 2.9127  | 183.1908 | 2.9082  | 0.1621  | 26.3 | 1 |
| California sea lion | 15 | 0.7759  | 158.9451 | 0.7241  | -0.2787 | 9.7  | B |
| California sea lion | 15 | 38.4037 | 283.9532 | -9.1872 | 37.2705 | 7.5  | 0 |
| California sea lion | 15 | 0.4593  | 111.9535 | 0.1717  | -0.426  | 15.9 | 2 |
| California sea lion | 15 | 0.478   | 243.9208 | 0.2101  | 0.4293  | 16.4 | 1 |
| California sea lion | 15 | 0.716   | 124.1405 | 0.4018  | -0.5926 | 4.6  | A |
| California sea lion | 15 | 0.1947  | 342.5445 | -0.1857 | 0.0584  | 12.4 | 1 |
| California sea lion | 15 | 1.2451  | 163.8644 | 1.1961  | -0.346  | 10.5 | 2 |
| California sea lion | 15 | 6.3218  | 71.0861  | -2.0473 | -5.9805 | 9.1  | A |
| California sea lion | 15 | 0.3397  | 251.4946 | 0.1078  | 0.3222  | 0.7  | 1 |
| California sea lion | 15 | 1.3331  | 137.8602 | 0.9885  | -0.8944 | 1.4  | B |
| California sea lion | 15 | 0.2336  | 345.2004 | -0.2259 | 0.0597  | 19.3 | 3 |
| California sea lion | 15 | 3.6138  | 65.713   | -1.4858 | -3.294  | 5.6  | B |

| <u>Species</u> | <u>Animal ID</u> | <u>error (km)</u> | <u>angle</u> | <u>lat error(km)</u> | <u>lon error (km)</u> | <u>GPS residual</u> | <u>ARGOS LC</u> |
|----------------|------------------|-------------------|--------------|----------------------|-----------------------|---------------------|-----------------|
| Cape fur seal  | 1                | 3.14              | 157.4799     | 2.9005               | -1.2027               | 3.3                 | B               |
| Cape fur seal  | 1                | 0.7878            | 88.2139      | -0.0246              | -0.7874               | 0.7                 | 1               |
| Cape fur seal  | 1                | 8.5366            | 280.6504     | -1.5808              | 8.3895                | 8.1                 | 0               |
| Cape fur seal  | 1                | 2.4321            | 298.0294     | -1.1431              | 2.1468                | 8.6                 | 0               |
| Cape fur seal  | 1                | 5.4206            | 144.6136     | 4.4188               | -3.139                | 3.1                 | A               |
| Cape fur seal  | 1                | 0.5968            | 300.2352     | -0.3005              | 0.5156                | 0.1                 | 1               |
| Cape fur seal  | 1                | 4.131             | 220.5046     | 3.1407               | 2.6831                | 0.2                 | A               |
| Cape fur seal  | 1                | 1.3423            | 140.4835     | 1.0355               | -0.8541               | 5                   | 1               |
| Cape fur seal  | 1                | 0.6633            | 307.1165     | -0.4003              | 0.529                 | 0.1                 | 1               |
| Cape fur seal  | 1                | 1.4959            | 48.2782      | -0.9956              | -1.1165               | 0.3                 | Z               |
| Cape fur seal  | 1                | 1.3072            | 22.3547      | -1.209               | -0.4972               | 0.9                 | 1               |
| Cape fur seal  | 1                | 6.4535            | 170.9092     | 6.3724               | -1.0197               | 11.7                | A               |
| Cape fur seal  | 1                | 0.705             | 76.9428      | -0.1593              | -0.6868               | 2.2                 | 2               |
| Cape fur seal  | 1                | 0.2931            | 293.3966     | -0.1164              | 0.269                 | 0.5                 | 0               |
| Cape fur seal  | 1                | 1.7655            | 93.2457      | 0.0998               | -1.7627               | 7                   | A               |
| Cape fur seal  | 1                | 1.4837            | 68.1829      | -0.5515              | -1.3774               | 10.7                | 2               |
| Cape fur seal  | 1                | 0.4329            | 201.1612     | 0.4037               | 0.1563                | 0.2                 | 1               |
| Cape fur seal  | 1                | 3.3707            | 18.765       | -3.1915              | -1.0843               | 21.6                | 1               |
| Cape fur seal  | 1                | 5.8345            | 348.5031     | -5.7175              | 1.1629                | 11.7                | 0               |
| Cape fur seal  | 1                | 1.008             | 292.3641     | -0.3836              | 0.9322                | 0.2                 | 1               |
| Cape fur seal  | 1                | 9.3958            | 38.4629      | -7.3585              | -5.8442               | 0.2                 | A               |
| Cape fur seal  | 1                | 4.5922            | 248.0727     | 1.7141               | 4.26                  | 10.3                | A               |
| Cape fur seal  | 1                | 0.9152            | 253.9745     | 0.2526               | 0.8796                | 8.1                 | A               |
| Cape fur seal  | 2                | 1.234             | 348.8371     | -1.2106              | 0.2389                | 1.2                 | A               |
| Cape fur seal  | 2                | 1.1919            | 125.0391     | 0.6843               | -0.9759               | 7.9                 | 0               |
| Cape fur seal  | 2                | 7.0658            | 86.8014      | -0.3965              | -7.0548               | 3.7                 | 0               |
| Cape fur seal  | 2                | 0.4394            | 325.003      | -0.3599              | 0.252                 | 0.2                 | 2               |
| Cape fur seal  | 2                | 6.1052            | 186.1915     | 6.0696               | 0.6585                | 29.6                | A               |
| Cape fur seal  | 2                | 6.2893            | 4.5349       | -6.2697              | -0.4973               | 0.1                 | A               |
| Cape fur seal  | 2                | 2.1953            | 232.3435     | 1.341                | 1.738                 | 0.3                 | A               |
| Cape fur seal  | 2                | 0.2654            | 169.7741     | 0.2611               | -0.0471               | 1.2                 | 2               |
| Cape fur seal  | 2                | 1.0961            | 12.838       | -1.0687              | -0.2436               | 8.4                 | A               |
| Cape fur seal  | 2                | 2.5258            | 47.0163      | -1.7222              | -1.8478               | 14.4                | 3               |
| Cape fur seal  | 2                | 1.9097            | 76.0118      | -0.4618              | -1.8531               | 0.2                 | B               |
| Cape fur seal  | 2                | 0.5511            | 185.0022     | 0.549                | 0.0481                | 3.3                 | A               |
| Cape fur seal  | 2                | 5.7273            | 336.9131     | -5.2688              | 2.2458                | 6.5                 | A               |
| Cape fur seal  | 2                | 12.3788           | 293.1618     | -4.8747              | 11.381                | 6.9                 | B               |
| Cape fur seal  | 2                | 1.8095            | 172.8727     | 1.7955               | -0.2245               | 9                   | A               |
| Cape fur seal  | 2                | 7.9015            | 73.981       | -2.1831              | -7.5947               | 8.2                 | 0               |
| Cape fur seal  | 2                | 0.4661            | 319.8506     | -0.3563              | 0.3005                | 13.5                | 1               |
| Cape fur seal  | 2                | 1.7741            | 159.2852     | 1.6594               | -0.6275               | 0.6                 | B               |
| Cape fur seal  | 2                | 2.7076            | 224.245      | 1.9395               | 1.8892                | 1.3                 | A               |
| Cape fur seal  | 2                | 0.2372            | 348.7276     | -0.2326              | 0.0464                | 4.2                 | 3               |
| Cape fur seal  | 2                | 22.5249           | 264.7083     | 2.0549               | 22.4289               | 23.5                | A               |
| Cape fur seal  | 2                | 4.6957            | 267.1074     | 0.236                | 4.6898                | 17.3                | A               |
| Cape fur seal  | 2                | 0.2944            | 145.2391     | 0.2419               | -0.1678               | 4.4                 | 0               |
| Cape fur seal  | 2                | 0.4084            | 298.1998     | -0.193               | 0.36                  | 4.6                 | A               |
| Cape fur seal  | 2                | 0.9616            | 119.3961     | 0.4719               | -0.8378               | 0.3                 | B               |
| Cape fur seal  | 2                | 4.411             | 280.1604     | -0.779               | 4.3418                | 6                   | B               |
| Cape fur seal  | 2                | 0.9328            | 13.6966      | -0.9063              | -0.2209               | 0.3                 | B               |
| Cape fur seal  | 2                | 2.7269            | 103.0327     | 0.6146               | -2.6566               | 11.9                | B               |
| Cape fur seal  | 2                | 8.695             | 257.447      | 1.8866               | 8.4872                | 0.1                 | A               |

|               |   |         |          |          |          |      |   |
|---------------|---|---------|----------|----------|----------|------|---|
| Cape fur seal | 2 | 48.8178 | 310.535  | -31.7888 | 37.1019  | 6.5  | A |
| Cape fur seal | 2 | 3.0169  | 248.5782 | 1.1015   | 2.8085   | 0.3  | 0 |
| Cape fur seal | 3 | 9.3812  | 264.4822 | 0.8982   | 9.3378   | 5.9  | A |
| Cape fur seal | 3 | 1.4758  | 39.4257  | -1.14    | -0.9373  | 18.4 | 0 |
| Cape fur seal | 3 | 0.185   | 236.6462 | 0.1017   | 0.1545   | 18.4 | 1 |
| Cape fur seal | 3 | 46.3968 | 53.5114  | -27.6531 | -37.3018 | 4    | B |
| Cape fur seal | 3 | 19.2089 | 114.6403 | 7.9948   | -17.4598 | 0.5  | A |
| Cape fur seal | 3 | 5.1463  | 17.8598  | -4.8984  | -1.5783  | 0.3  | 0 |
| Cape fur seal | 3 | 0.6908  | 3.2235   | -0.6897  | -0.0388  | 24.7 | 0 |
| Cape fur seal | 3 | 16.5322 | 199.1439 | 15.6166  | 5.4216   | 2.4  | A |
| Cape fur seal | 3 | 4.2767  | 60.5166  | -2.1055  | -3.7228  | 6.7  | A |
| Cape fur seal | 3 | 4.8131  | 198.1847 | 4.5726   | 1.5021   | 10.1 | B |
| Cape fur seal | 3 | 2.4875  | 127.3013 | 1.5073   | -1.9787  | 9.7  | B |
| Cape fur seal | 3 | 1.1119  | 203.1106 | 1.0227   | 0.4364   | 0.1  | B |
| Cape fur seal | 3 | 0.554   | 160.9731 | 0.5237   | -0.1806  | 13.3 | 1 |
| Cape fur seal | 3 | 0.3356  | 9.2937   | -0.3312  | -0.0542  | 22.7 | 1 |
| Cape fur seal | 3 | 0.7539  | 208.3354 | 0.6636   | 0.3578   | 21.3 | A |
| Cape fur seal | 3 | 1.3666  | 158.0762 | 1.2678   | -0.5103  | 3.4  | 1 |
| Cape fur seal | 3 | 1.2506  | 98.0513  | 0.1751   | -1.2383  | 11.4 | 1 |
| Cape fur seal | 3 | 3.229   | 342.0034 | -3.0711  | 0.9976   | 23   | B |
| Cape fur seal | 3 | 1.2418  | 50.5876  | -0.7884  | -0.9594  | 4.2  | 0 |
| Cape fur seal | 3 | 2.3942  | 286.8011 | -0.6923  | 2.292    | 18.1 | A |
| Cape fur seal | 3 | 0.2109  | 49.2861  | -0.1376  | -0.1599  | 13.9 | 1 |
| Cape fur seal | 3 | 2.5128  | 351.8558 | -2.4875  | 0.356    | 1    | 0 |
| Cape fur seal | 4 | 3.4261  | 236.8089 | 1.8752   | 2.8671   | 0.1  | 0 |
| Cape fur seal | 4 | 4.4337  | 62.5663  | -2.0434  | -3.9351  | 0.3  | A |
| Cape fur seal | 4 | 3.1144  | 173.8168 | 3.0963   | -0.3354  | 9    | B |
| Cape fur seal | 4 | 1.9899  | 305.1554 | -1.1459  | 1.627    | 10   | B |
| Cape fur seal | 4 | 1.3998  | 245.7981 | 0.5738   | 1.2767   | 16.5 | B |
| Cape fur seal | 4 | 4.3753  | 78.05    | -0.9069  | -4.2804  | 12.1 | B |
| Cape fur seal | 4 | 22.2144 | 337.8351 | -20.5765 | 8.3809   | 22.3 | B |
| Cape fur seal | 4 | 3.9506  | 328.9451 | -3.3846  | 2.038    | 0.7  | 1 |
| Cape fur seal | 4 | 1.5828  | 65.7169  | -0.651   | -1.4428  | 1.5  | 0 |
| Cape fur seal | 4 | 6.4431  | 74.1377  | -1.7631  | -6.1978  | 0.3  | B |
| Cape fur seal | 5 | 1.0076  | 273.432  | -0.0604  | 1.0058   | 12.4 | 1 |
| Cape fur seal | 5 | 1.6325  | 160.0608 | 1.5346   | -0.5567  | 26.1 | 1 |
| Cape fur seal | 5 | 1.9855  | 298.2723 | -0.9406  | 1.7486   | 26.6 | 0 |
| Cape fur seal | 5 | 11.2254 | 213.2542 | 9.3855   | 6.1555   | 7.9  | B |
| Cape fur seal | 5 | 1.0569  | 277.5238 | -0.1384  | 1.0478   | 13.3 | 1 |
| Cape fur seal | 5 | 1.8268  | 120.8194 | 0.9358   | -1.5688  | 12.3 | A |
| Cape fur seal | 5 | 2.9128  | 264.9535 | 0.2559   | 2.9015   | 9    | A |
| Cape fur seal | 5 | 2.4861  | 118.5816 | 1.1892   | -2.1831  | 14.1 | 2 |
| Cape fur seal | 5 | 4.3179  | 74.9314  | -1.1233  | -4.1694  | 6.5  | 0 |
| Cape fur seal | 5 | 2.9437  | 65.8412  | -1.2051  | -2.6859  | 7.4  | A |
| Cape fur seal | 5 | 14.1382 | 151.2906 | 12.3982  | -6.7915  | 7.4  | A |
| Cape fur seal | 5 | 2.6956  | 256.4707 | 0.6303   | 2.6208   | 17.3 | 0 |
| Cape fur seal | 5 | 1.4329  | 291.3983 | -0.5229  | 1.3342   | 8.8  | B |
| Cape fur seal | 5 | 0.4751  | 281.3087 | -0.0932  | 0.4659   | 3.5  | 0 |
| Cape fur seal | 5 | 2.472   | 128.0021 | 1.5218   | -1.9479  | 14   | A |
| Cape fur seal | 5 | 9.3748  | 242.9667 | 4.2579   | 8.3505   | 6.5  | B |
| Cape fur seal | 5 | 1.5576  | 294.8177 | -0.6539  | 1.4137   | 18.9 | 0 |
| Cape fur seal | 6 | 8.7726  | 109.8055 | 2.9694   | -8.2537  | 1    | B |
| Cape fur seal | 6 | 11.0637 | 297.4973 | -5.1125  | 9.8139   | 11.8 | B |

|               |   |         |          |         |          |      |   |
|---------------|---|---------|----------|---------|----------|------|---|
| Cape fur seal | 6 | 6.449   | 303.1168 | -3.5247 | 5.4014   | 3.5  | A |
| Cape fur seal | 6 | 2.3974  | 182.9392 | 2.3943  | 0.1229   | 20.3 | A |
| Cape fur seal | 6 | 10.8936 | 85.2715  | -0.9034 | -10.8565 | 11.3 | A |
| Cape fur seal | 6 | 12.2416 | 62.2456  | -5.706  | -10.8332 | 17.1 | B |
| Cape fur seal | 6 | 1.8897  | 13.4333  | -1.838  | -0.439   | 3.1  | A |
| Cape fur seal | 6 | 4.8962  | 152.8537 | 4.3566  | -2.2339  | 13.1 | B |
| Cape fur seal | 6 | 1.597   | 141.5856 | 1.2513  | -0.9923  | 0.2  | A |
| Cape fur seal | 6 | 3.6245  | 77.8     | -0.7665 | -3.5426  | 1.8  | B |



| <u>Species</u>      | <u>Animal ID</u> | <u>error (km)</u> | <u>angle</u> | <u>lat error(km)</u> | <u>lon error (km)</u> | <u>GPS residual</u> | <u>ARGOS LC</u> |
|---------------------|------------------|-------------------|--------------|----------------------|-----------------------|---------------------|-----------------|
| Australian fur seal | 16               | 0.2627            | 235.1862     | 0.15                 | 0.2156                | 28.9396             | 0               |
| Australian fur seal | 16               | 0.9053            | 149.0663     | 0.7765               | -0.4654               | 11.2325             | 1               |
| Australian fur seal | 16               | 0.8905            | 276.2782     | -0.0974              | 0.8852                | 15.5906             | 2               |
| Australian fur seal | 16               | 0.418             | 227.4314     | 0.2827               | 0.3078                | 2.8841              | 2               |
| Australian fur seal | 16               | 0.4122            | 290.8942     | -0.147               | 0.3851                | 8.5697              | 2               |
| Australian fur seal | 16               | 17.733            | 98.26        | 2.5279               | -17.549               | 20.49               | 0               |
| Australian fur seal | 16               | 1.4563            | 91.9506      | 0.0494               | -1.4554               | 6.8901              | 1               |
| Australian fur seal | 16               | 4.4292            | 238.5977     | 2.3069               | 3.7805                | 4.363               | 0               |
| Australian fur seal | 16               | 2.1533            | 249.7061     | 0.7466               | 2.0197                | 11.1215             | 1               |
| Australian fur seal | 16               | 0.0598            | 65.3528      | -0.0249              | -0.0544               | 10.7304             | 3               |
| Australian fur seal | 16               | 5.0494            | 248.4609     | 1.8524               | 4.6968                | 21.605              | B               |
| Australian fur seal | 16               | 2.4138            | 89.1         | -0.0383              | -2.4135               | 0.1737              | 0               |
| Australian fur seal | 16               | 14.3929           | 126.8312     | 8.6195               | -11.5201              | 24.3382             | B               |
| Australian fur seal | 16               | 0.2165            | 107.2228     | 0.0641               | -0.2068               | 5.7332              | 3               |
| Australian fur seal | 16               | 0.5995            | 116.1496     | 0.2642               | -0.5381               | 1.8594              | 1               |
| Australian fur seal | 16               | 2.6503            | 124.5208     | 1.5016               | -2.1836               | 10.7111             | 1               |
| Australian fur seal | 16               | 1.0736            | 251.0237     | 0.349                | 1.0152                | 10.228              | 2               |
| Australian fur seal | 16               | 0.2742            | 343.8111     | -0.2634              | 0.0765                | 14.8279             | 2               |
| Australian fur seal | 16               | 1.2138            | 327.3651     | -1.0222              | 0.6546                | 19.0655             | A               |
| Australian fur seal | 16               | 8.6366            | 222.8094     | 6.3338               | 5.8691                | 19.8372             | A               |
| Australian fur seal | 16               | 0.2478            | 87.3898      | -0.0113              | -0.2475               | 4.3185              | 2               |
| Australian fur seal | 16               | 0.5343            | 238.3987     | 0.28                 | 0.4551                | 0.325               | 1               |
| Australian fur seal | 16               | 3.8939            | 256.0069     | 0.9407               | 3.7784                | 2.1464              | 0               |
| Australian fur seal | 16               | 2.9895            | 22.688       | -2.7583              | -1.1531               | 6.9383              | 1               |
| Australian fur seal | 16               | 71.7149           | 93.7709      | 4.3823               | -71.5604              | 3.4783              | B               |
| Australian fur seal | 17               | 1.9301            | 66.5967      | -0.7668              | -1.7713               | 0                   | 1               |
| Australian fur seal | 17               | 0.5486            | 77.572       | -0.1181              | -0.5357               | 0                   | 3               |
| Australian fur seal | 17               | 0.5009            | 274.8737     | -0.0426              | 0.4991                | 0                   | 3               |
| Australian fur seal | 18               | 3.896             | 112.3923     | 1.4833               | -3.6022               | 8.9237              | 1               |
| Australian fur seal | 18               | 1.5084            | 268.8666     | 0.0297               | 1.5081                | 12.6886             | 2               |
| Australian fur seal | 18               | 9.3316            | 76.2993      | -2.2155              | -9.0661               | 20.5497             | 0               |
| Australian fur seal | 18               | 1.8911            | 299.474      | -0.9307              | 1.6464                | 8.9137              | A               |
| Australian fur seal | 18               | 8.2771            | 112.8281     | 3.2075               | -7.6288               | 11.6571             | 0               |
| Australian fur seal | 18               | 11.494            | 260.5524     | 1.8785               | 11.3381               | 11.1548             | 0               |
| Australian fur seal | 18               | 5.0423            | 200.8249     | 4.7127               | 1.7926                | 14.0446             | 1               |
| Australian fur seal | 18               | 9.7135            | 56.5953      | -5.3521              | -8.1089               | 19.5587             | Z               |
| Australian fur seal | 18               | 83.8771           | 325.7124     | -69.4482             | 47.2513               | 24.2711             | A               |
| Australian fur seal | 18               | 51.2637           | 78.6005      | -10.2977             | -50.2527              | 13.4405             | 0               |
| Australian fur seal | 18               | 184.2988          | 249.0187     | 64.0547              | 172.0873              | 17.9864             | B               |
| Australian fur seal | 18               | 140.9606          | 89.9161      | -1.5209              | -140.9666             | 1.086               | B               |
| Australian fur seal | 18               | 93.1562           | 80.0068      | -16.7232             | -91.7445              | 14.8686             | B               |
| Australian fur seal | 18               | 380.4179          | 286.1077     | -114.4599            | 365.5725              | 13.2337             | B               |
| Australian fur seal | 18               | 9.5602            | 152.9553     | 8.5135               | -4.3469               | 0.424               | 0               |
| Australian fur seal | 18               | 7.4307            | 162.4409     | 7.0842               | -2.2418               | 17.2804             | B               |
| Australian fur seal | 18               | 1.8023            | 70.7538      | -0.5943              | -1.7016               | 25.0275             | 1               |
| Australian fur seal | 18               | 1.5286            | 118.694      | 0.7338               | -1.3409               | 11.4812             | 2               |
| Australian fur seal | 18               | 0.3863            | 275.2443     | -0.0353              | 0.3847                | 13.0231             | 3               |
| Australian fur seal | 18               | 0.4113            | 87.3873      | -0.0188              | -0.4108               | 11.9097             | 2               |
| Australian fur seal | 18               | 2.4194            | 293.0205     | -0.9465              | 2.2268                | 21.8479             | 0               |
| Australian fur seal | 18               | 8.4813            | 94.9878      | 0.7327               | -8.4492               | 5.8446              | 0               |
| Australian fur seal | 18               | 3.157             | 129.9376     | 2.0263               | -2.4206               | 9.089               | A               |
| Australian fur seal | 18               | 5.7854            | 96.4015      | 0.6429               | -5.7493               | 15.4482             | 0               |
| Australian fur seal | 18               | 26.7295           | 264.5954     | 2.4712               | 26.6108               | 0.153               | B               |
| Australian fur seal | 18               | 52.9087           | 241.2186     | 25.3326              | 46.3727               | 20.1742             | B               |

| <u>Species</u>         | <u>Animal ID</u> | <u>error (km)</u> | <u>angle</u> | <u>lat error(km)</u> | <u>lon error (km)</u> | <u>GPS residual</u> | <u>ARGOS LC</u> |
|------------------------|------------------|-------------------|--------------|----------------------|-----------------------|---------------------|-----------------|
| Northern elephant seal | 23               | 0.7045            | 18.5641      | -0.6678              | -0.2243               | 9.6                 | B               |
| Northern elephant seal | 23               | 4.6766            | 72.8741      | -1.376               | -4.4693               | 13.4                | B               |
| Northern elephant seal | 23               | 5.3432            | 181.5811     | 5.3412               | 0.1474                | 16.5                | B               |
| Northern elephant seal | 23               | 6.8157            | 295.3355     | -2.9143              | 6.1601                | 17                  | B               |
| Northern elephant seal | 23               | 15.768            | 263.2277     | 1.8742               | 15.658                | 9.3                 | A               |
| Northern elephant seal | 23               | 1.4533            | 3.2377       | -1.451               | -0.0821               | 18                  | Z               |
| Northern elephant seal | 23               | 762.3402          | 97.6613      | 137.5762             | -756.3309             | 6.1                 | Z               |
| Northern elephant seal | 23               | 5.6068            | 330.087      | -4.8594              | 2.796                 | 14.4                | B               |
| Northern elephant seal | 23               | 1.4385            | 82.8585      | -0.1787              | -1.4273               | 3.1                 | Z               |
| Northern elephant seal | 23               | 9.7141            | 261.3422     | 1.4682               | 9.6034                | 1.9                 | B               |
| Northern elephant seal | 23               | 1.0115            | 84.2131      | -0.1019              | -1.0064               | 21.9                | B               |
| Northern elephant seal | 23               | 37.7729           | 268.085      | 1.3554               | 37.7519               | 5.4                 | A               |
| Northern elephant seal | 23               | 5.7053            | 141.1762     | 4.4457               | -3.5768               | 13.9                | B               |
| Northern elephant seal | 23               | 2.1134            | 339.2389     | -1.9761              | 0.7491                | 19.4                | A               |
| Northern elephant seal | 23               | 77.5113           | 73.9971      | -21.0025             | -74.5083              | 13.6                | B               |
| Northern elephant seal | 23               | 2.2818            | 92.6831      | 0.1072               | -2.2793               | 0.4                 | 0               |
| Northern elephant seal | 23               | 26.1249           | 283.3707     | -5.9983              | 25.4168               | 22.5                | B               |
| Northern elephant seal | 23               | 70.1035           | 264.849      | 6.6201               | 69.8212               | 16.7                | A               |
| Northern elephant seal | 23               | 1.7898            | 235.6933     | 1.0089               | 1.4785                | 11.6                | 0               |
| Northern elephant seal | 23               | 1.0385            | 197.725      | 0.9892               | 0.3162                | 17.9                | B               |
| Northern elephant seal | 23               | 5.2372            | 213.283      | 4.3788               | 2.8741                | 4.7                 | B               |
| Northern elephant seal | 23               | 2.1602            | 184.0435     | 2.1548               | 0.1523                | 4.8                 | B               |
| Northern elephant seal | 23               | 1.0668            | 35.1387      | -0.8724              | -0.614                | 1.3                 | B               |
| Northern elephant seal | 23               | 1.0559            | 158.6084     | 0.9832               | -0.3851               | 1.8                 | B               |
| Northern elephant seal | 23               | 105.0672          | 292.9904     | -40.2914             | 96.7239               | 0.8                 | Z               |
| Northern elephant seal | 23               | 1.3446            | 204.2538     | 1.226                | 0.5523                | 13.4                | B               |
| Northern elephant seal | 23               | 24.4576           | 158.6579     | 22.7868              | -8.901                | 7.4                 | A               |
| Northern elephant seal | 23               | 10.3036           | 25.5531      | -9.2941              | -4.4444               | 16.9                | B               |
| Northern elephant seal | 23               | 12.4009           | 240.9659     | 6.028                | 10.8425               | 13.2                | A               |
| Northern elephant seal | 23               | 8.7028            | 333.6952     | -7.8004              | 3.8566                | 13.6                | B               |
| Northern elephant seal | 23               | 15.5538           | 42.5965      | -11.4402             | -10.5273              | 9.5                 | B               |
| Northern elephant seal | 23               | 1.2478            | 134.7768     | 0.879                | -0.8858               | 25.8                | B               |
| Northern elephant seal | 23               | 2.8393            | 119.5447     | 1.4006               | -2.4701               | 18.3                | B               |
| Northern elephant seal | 23               | 0.8281            | 219.3277     | 0.6406               | 0.5248                | 8.2                 | B               |
| Northern elephant seal | 23               | 1.8585            | 106.8715     | 0.5396               | -1.7785               | 8.3                 | B               |
| Northern elephant seal | 23               | 4.9422            | 101.9712     | 1.0271               | -4.8347               | 10                  | A               |
| Northern elephant seal | 23               | 1.6866            | 257.131      | 0.3759               | 1.6443                | 0.7                 | B               |
| Northern elephant seal | 23               | 3.476             | 278.5558     | -0.5161              | 3.4373                | 8.8                 | B               |
| Northern elephant seal | 23               | 30.2812           | 104.9873     | 7.9093               | -29.2512              | 11.7                | Z               |
| Northern elephant seal | 23               | 33.6754           | 252.689      | 10.1156              | 32.1502               | 4.9                 | A               |
| Northern elephant seal | 23               | 3.0742            | 58.4226      | -1.6092              | -2.619                | 0.2                 | B               |
| Northern elephant seal | 23               | 5.8484            | 69.4483      | -2.0503              | -5.4762               | 19.1                | B               |
| Northern elephant seal | 23               | 30.0925           | 69.7574      | -10.3364             | -28.234               | 12.3                | B               |
| Northern elephant seal | 23               | 74.6908           | 265.4454     | 6.4621               | 74.4569               | 9.7                 | Z               |
| Northern elephant seal | 23               | 10.6312           | 90.8781      | 0.174                | -10.6299              | 18.3                | A               |
| Northern elephant seal | 23               | 3.5008            | 112.3288     | 1.3311               | -3.2383               | 13.6                | B               |
| Northern elephant seal | 23               | 12.7697           | 236.3324     | 7.091                | 10.6278               | 20.5                | B               |
| Northern elephant seal | 23               | 7.5305            | 287.6833     | -2.282               | 7.1747                | 11.7                | B               |
| Northern elephant seal | 23               | 16.0184           | 279.4608     | -2.6062              | 15.8006               | 19.5                | A               |
| Northern elephant seal | 23               | 13.4978           | 302.4468     | -7.2282              | 11.3907               | 22.4                | B               |
| Northern elephant seal | 23               | 814.7328          | 291.6313     | -242.199             | 759.4014              | 9.1                 | B               |
| Northern elephant seal | 23               | 201.0622          | 297.1495     | -88.4813             | 178.9329              | 16.4                | B               |
| Northern elephant seal | 23               | 2.2321            | 240.9185     | 1.0853               | 1.9507                | 20                  | A               |
| Northern elephant seal | 23               | 3.4628            | 258.9484     | 0.6649               | 3.3986                | 11.2                | B               |
| Northern elephant seal | 23               | 1.1989            | 302.0864     | -0.6367              | 1.0157                | 18.4                | 0               |
| Northern elephant seal | 23               | 459.7801          | 109.0623     | 168.6872             | -434.9116             | 19.4                | Z               |
| Northern elephant seal | 23               | 6.7622            | 311.5099     | -4.4791              | 5.0638                | 0.9                 | A               |
| Northern elephant seal | 23               | 11.5811           | 319.7848     | -8.8383              | 7.4775                | 15.5                | B               |
| Northern elephant seal | 23               | 5.9725            | 72.7195      | -1.771               | -5.7029               | 8.5                 | B               |
| Northern elephant seal | 23               | 5.978             | 67.7681      | -2.259               | -5.5336               | 0.9                 | B               |
| Northern elephant seal | 23               | 13.3066           | 235.8163     | 7.4874               | 11.0077               | 8.9                 | B               |
| Northern elephant seal | 23               | 7.4973            | 260.285      | 1.2702               | 7.3897                | 9.2                 | B               |
| Northern elephant seal | 23               | 10.9066           | 292.5625     | -4.1755              | 10.0718               | 7.4                 | B               |
| Northern elephant seal | 23               | 1.041             | 198.622      | 0.9865               | 0.3324                | 18.4                | B               |
| Northern elephant seal | 23               | 5.1254            | 231.2041     | 3.2128               | 3.9947                | 0.4                 | B               |
| Northern elephant seal | 23               | 6.648             | 103.44       | 1.549                | -6.4659               | 1.2                 | B               |
| Northern elephant seal | 23               | 2.2108            | 196.2408     | 2.1226               | 0.6183                | 0.6                 | B               |

|                        |    |           |          |           |            |      |   |
|------------------------|----|-----------|----------|-----------|------------|------|---|
| Northern elephant seal | 23 | 12.1585   | 247.7822 | 4.6091    | 11.2558    | 7    | B |
| Northern elephant seal | 23 | 188.2076  | 72.8814  | -52.5109  | -179.8906  | 0.5  | B |
| Northern elephant seal | 23 | 2.9901    | 29.2036  | -2.6098   | -1.4589    | 0.4  | B |
| Northern elephant seal | 23 | 3.1708    | 131.2375 | 2.0907    | -2.3844    | 0.2  | B |
| Northern elephant seal | 23 | 10.2843   | 237.0086 | 5.6062    | 8.626      | 13.3 | B |
| Northern elephant seal | 23 | 4.0122    | 317.7392 | -2.9688   | 2.6982     | 7.8  | B |
| Northern elephant seal | 23 | 19.2955   | 10.3149  | -18.9827  | -3.455     | 16.6 | B |
| Northern elephant seal | 23 | 3.7443    | 42.9599  | -2.7396   | -2.5517    | 8    | A |
| Northern elephant seal | 23 | 1934.0724 | 97.3722  | 555.2192  | -1940.0932 | 25.6 | A |
| Northern elephant seal | 23 | 3.819     | 315.6508 | -2.7304   | 2.6696     | 14.2 | B |
| Northern elephant seal | 23 | 0.8098    | 63.2923  | -0.3639   | -0.7234    | 15.6 | 2 |
| Northern elephant seal | 23 | 7.886     | 149.9879 | 6.8296    | -3.9445    | 14.4 | B |
| Northern elephant seal | 23 | 5.4569    | 287.3961 | -1.6299   | 5.2073     | 0.5  | B |
| Northern elephant seal | 23 | 13.9888   | 289.3373 | -4.6217   | 13.1996    | 15.6 | B |
| Northern elephant seal | 24 | 8.1511    | 111.4372 | 2.9825    | -7.5872    | 14.5 | B |
| Northern elephant seal | 24 | 3.4066    | 257.9323 | 0.7129    | 3.3313     | 15.5 | B |
| Northern elephant seal | 24 | 3.9065    | 124.611  | 2.2195    | -3.2151    | 5.3  | A |
| Northern elephant seal | 24 | 11.027    | 292.8967 | -4.2841   | 10.1582    | 0.8  | A |
| Northern elephant seal | 24 | 377.1463  | 256.0345 | 99.2171   | 366.0752   | 11.5 | B |
| Northern elephant seal | 24 | 13.7373   | 105.4984 | 3.6814    | -13.2377   | 4.3  | B |
| Northern elephant seal | 24 | 47.2316   | 240.2812 | 23.5258   | 41.0192    | 0.2  | B |
| Northern elephant seal | 24 | 7.7646    | 297.4196 | -3.5725   | 6.8923     | 12   | B |
| Northern elephant seal | 24 | 17.1618   | 258.3164 | 3.4942    | 16.8062    | 7.3  | A |
| Northern elephant seal | 24 | 4.6505    | 122.8085 | 2.5208    | -3.9086    | 9.3  | B |
| Northern elephant seal | 24 | 0.4541    | 73.0653  | -0.1322   | -0.4344    | 0.4  | A |
| Northern elephant seal | 24 | 5.3506    | 80.9939  | -0.8355   | -5.2847    | 25.9 | B |
| Northern elephant seal | 24 | 0.8151    | 292.3263 | -0.3096   | 0.754      | 18.7 | A |
| Northern elephant seal | 24 | 0.9992    | 352.6062 | -0.9909   | 0.1286     | 22.2 | B |
| Northern elephant seal | 24 | 5.025     | 275.7272 | -0.4996   | 4.9999     | 10.7 | B |
| Northern elephant seal | 24 | 1.7474    | 269.513  | 0.0151    | 1.7473     | 14.7 | B |
| Northern elephant seal | 24 | 1.4906    | 49.2922  | -0.9721   | -1.13      | 1.3  | B |
| Northern elephant seal | 24 | 4.7353    | 68.7914  | -1.7116   | -4.4145    | 20   | B |
| Northern elephant seal | 24 | 50.1193   | 255.783  | 12.4773   | 48.5845    | 17.5 | B |
| Northern elephant seal | 24 | 5.1125    | 241.8575 | 2.4128    | 4.5081     | 15.9 | B |
| Northern elephant seal | 24 | 190.3332  | 296.5929 | -83.2051  | 170.2046   | 14.5 | Z |
| Northern elephant seal | 24 | 677.7864  | 102.3142 | 175.5127  | -662.8319  | 1.3  | B |
| Northern elephant seal | 24 | 847.0051  | 71.5503  | -226.3564 | -804.3827  | 45.2 | B |
| Northern elephant seal | 25 | 0.4871    | 238.759  | 0.2526    | 0.4164     | 14.4 | B |
| Northern elephant seal | 25 | 2.1485    | 339.8142 | -2.0165   | 0.7414     | 17.7 | B |
| Northern elephant seal | 25 | 99.5132   | 252.0378 | 31.2098   | 94.664     | 0.6  | B |
| Northern elephant seal | 25 | 1.4423    | 272.9407 | -0.0739   | 1.4404     | 13.8 | A |
| Northern elephant seal | 25 | 35.7867   | 74.0442  | -9.769    | -34.4081   | 13.4 | B |
| Northern elephant seal | 25 | 9.3098    | 139.9966 | 7.1334    | -5.9846    | 1.4  | B |
| Northern elephant seal | 25 | 7.6607    | 133.7774 | 5.3019    | -5.5313    | 22.3 | B |
| Northern elephant seal | 25 | 3.6182    | 185.6357 | 3.6007    | 0.3553     | 10.7 | B |
| Northern elephant seal | 25 | 12.1518   | 71.2632  | -3.8955   | -11.5078   | 4.9  | B |
| Northern elephant seal | 25 | 1.2007    | 87.976   | -0.0423   | -1.2       | 0.8  | B |
| Northern elephant seal | 25 | 4.3854    | 235.0767 | 2.5114    | 3.5957     | 16.2 | B |
| Northern elephant seal | 25 | 3.6026    | 304.1173 | -2.0201   | 2.9826     | 16.6 | B |
| Northern elephant seal | 25 | 6.8112    | 50.4548  | -4.3348   | -5.2523    | 19.1 | B |
| Northern elephant seal | 25 | 1.0956    | 135.1426 | 0.7766    | -0.7727    | 0.6  | B |
| Northern elephant seal | 25 | 9.6312    | 238.8014 | 4.9938    | 8.2383     | 13.1 | B |
| Northern elephant seal | 25 | 2.0187    | 79.1938  | -0.3782   | -1.9829    | 0.5  | B |
| Northern elephant seal | 25 | 2.9038    | 244.6498 | 1.2437    | 2.6242     | 9.1  | B |
| Northern elephant seal | 25 | 4.2633    | 58.1647  | -2.2479   | -3.622     | 10.4 | B |
| Northern elephant seal | 25 | 6.5237    | 106.1694 | 1.8195    | -6.2657    | 0.2  | A |
| Northern elephant seal | 25 | 10.3275   | 358.2498 | -10.3227  | 0.3154     | 2.8  | B |
| Northern elephant seal | 25 | 14.5229   | 73.852   | -4.0253   | -13.9499   | 5.8  | B |
| Northern elephant seal | 25 | 25.8937   | 254.9047 | 6.7878    | 25.0003    | 17.7 | B |
| Northern elephant seal | 25 | 56.6606   | 75.9847  | -13.5057  | -54.9743   | 12.6 | Z |
| Northern elephant seal | 25 | 8.4496    | 232.0503 | 5.1995    | 6.6629     | 22.5 | B |
| Northern elephant seal | 25 | 1.5136    | 63.7284  | -0.6698   | -1.3572    | 14.1 | B |
| Northern elephant seal | 25 | 6.5293    | 255.7775 | 1.6071    | 6.3292     | 22.8 | B |
| Northern elephant seal | 25 | 296.996   | 294.1538 | -116.2017 | 271.0315   | 10.2 | B |
| Northern elephant seal | 25 | 3.3756    | 330.599  | -2.9406   | 1.6571     | 0.6  | A |
| Northern elephant seal | 25 | 29.2923   | 95.5815  | 2.9117    | -29.1535   | 0.7  | B |
| Northern elephant seal | 25 | 7.0389    | 273.0287 | -0.3682   | 7.029      | 13.8 | B |
| Northern elephant seal | 25 | 2.0023    | 334.5476 | -1.8079   | 0.8605     | 0.8  | B |

|                        |    |           |          |           |            |      |   |
|------------------------|----|-----------|----------|-----------|------------|------|---|
| Northern elephant seal | 25 | 3.6984    | 289.0704 | -1.2074   | 3.4954     | 1.2  | A |
| Northern elephant seal | 25 | 14.4617   | 134.0298 | 10.0595   | -10.3976   | 9.1  | B |
| Northern elephant seal | 25 | 1.3328    | 217.9179 | 1.0515    | 0.819      | 1    | B |
| Northern elephant seal | 25 | 2.571     | 77.6083  | -0.5512   | -2.5111    | 3.2  | B |
| Northern elephant seal | 25 | 2.2079    | 104.2677 | 0.5445    | -2.1398    | 22.5 | B |
| Northern elephant seal | 25 | 2.5948    | 93.9759  | 0.1804    | -2.5885    | 15.3 | B |
| Northern elephant seal | 25 | 17.5526   | 23.7723  | -16.0595  | -7.0755    | 6.9  | B |
| Northern elephant seal | 25 | 34.5534   | 289.6781 | -11.5537  | 32.5355    | 0.5  | B |
| Northern elephant seal | 25 | 1.2699    | 88.555   | -0.0319   | -1.2695    | 18.8 | B |
| Northern elephant seal | 25 | 1.7482    | 216.02   | 1.4141    | 1.0281     | 21.5 | B |
| Northern elephant seal | 25 | 2.4423    | 334.7302 | -2.2085   | 1.0426     | 0.8  | A |
| Northern elephant seal | 25 | 9.4387    | 117.6353 | 4.3834    | -8.3619    | 14.7 | B |
| Northern elephant seal | 25 | 4.2892    | 106.9035 | 1.2484    | -4.1039    | 32   | B |
| Northern elephant seal | 25 | 2.3318    | 77.2455  | -0.5144   | -2.2743    | 0.2  | 0 |
| Northern elephant seal | 25 | 1.6389    | 57.5693  | -0.8788   | -1.3833    | 6.3  | A |
| Northern elephant seal | 25 | 1.4348    | 87.4109  | -0.0647   | -1.4334    | 9.6  | B |
| Northern elephant seal | 25 | 0.8194    | 277.9674 | -0.1135   | 0.8114     | 0.2  | A |
| Northern elephant seal | 25 | 1.2681    | 240.8548 | 0.6177    | 1.1075     | 1.2  | A |
| Northern elephant seal | 25 | 14.0695   | 279.2212 | -2.2398   | 13.8877    | 2.6  | B |
| Northern elephant seal | 25 | 29.658    | 243.6623 | 13.2129   | 26.5794    | 6.3  | B |
| Northern elephant seal | 25 | 1.3632    | 311.3273 | -0.9001   | 1.0237     | 9.3  | B |
| Northern elephant seal | 25 | 1.3647    | 120.5171 | 0.6931    | -1.1756    | 0.2  | B |
| Northern elephant seal | 25 | 0.14      | 145.1032 | 0.1148    | -0.0801    | 2.8  | B |
| Northern elephant seal | 25 | 23.6371   | 96.0959  | 2.5528    | -23.5034   | 19.3 | B |
| Northern elephant seal | 25 | 1.444     | 245.1206 | 0.6076    | 1.31       | 2    | B |
| Northern elephant seal | 25 | 0.4967    | 187.1675 | 0.4928    | 0.062      | 22.7 | B |
| Northern elephant seal | 25 | 3.0449    | 82.669   | -0.3879   | -3.02      | 14.4 | 1 |
| Northern elephant seal | 25 | 1.7086    | 235.0064 | 0.98      | 1.3997     | 0.1  | B |
| Northern elephant seal | 25 | 8.8331    | 118.2794 | 4.1891    | -7.7788    | 8.1  | B |
| Northern elephant seal | 25 | 4.9737    | 251.5033 | 1.5795    | 4.7168     | 13.3 | B |
| Northern elephant seal | 25 | 3.085     | 296.4141 | -1.3718   | 2.7629     | 47.4 | B |
| Northern elephant seal | 25 | 7.1916    | 266.5462 | 0.4367    | 7.1786     | 9.6  | B |
| Northern elephant seal | 25 | 5.2686    | 235.7107 | 2.9693    | 4.3529     | 3.9  | B |
| Northern elephant seal | 25 | 18.5973   | 60.3348  | -9.1886   | -16.1598   | 6.2  | B |
| Northern elephant seal | 25 | 10.563    | 303.8325 | -5.8765   | 8.7743     | 4.5  | B |
| Northern elephant seal | 25 | 4.1021    | 65.4065  | -1.7064   | -3.73      | 0.8  | B |
| Northern elephant seal | 25 | 1717.8332 | 97.8937  | 419.6156  | -1710.2137 | 15   | B |
| Northern elephant seal | 25 | 849.9141  | 101.7648 | 214.881   | -832.9406  | 16.9 | B |
| Northern elephant seal | 25 | 5.3433    | 293.3587 | -2.1172   | 4.9054     | 0.7  | B |
| Northern elephant seal | 25 | 27.1407   | 271.7737 | -0.7977   | 27.1277    | 0.7  | B |
| Northern elephant seal | 25 | 28.8232   | 103.7241 | 6.8833    | -28.0003   | 0.2  | B |
| Northern elephant seal | 25 | 9.6263    | 117.3742 | 4.4304    | -8.5483    | 13.3 | B |
| Northern elephant seal | 25 | 4.0058    | 188.9722 | 3.9568    | 0.6247     | 12.3 | B |
| Northern elephant seal | 25 | 9.2021    | 201.2729 | 8.5757    | 3.3386     | 0.6  | B |
| Northern elephant seal | 25 | 7.2825    | 42.8247  | -5.3399   | -4.9503    | 29.1 | B |
| Northern elephant seal | 25 | 13.8043   | 74.473   | -3.6852   | -13.3005   | 9.4  | B |
| Northern elephant seal | 25 | 11.9188   | 291.2583 | -4.3144   | 11.1078    | 1    | B |
| Northern elephant seal | 25 | 6.5936    | 39.8133  | -5.0638   | -4.2218    | 0.7  | B |
| Northern elephant seal | 25 | 2.9484    | 280.5622 | -0.54     | 2.8984     | 4.5  | A |
| Northern elephant seal | 25 | 8.7761    | 125.8923 | 5.148     | -7.1097    | 10.4 | B |
| Northern elephant seal | 25 | 28.0847   | 104.165  | 6.9165    | -27.2308   | 4    | B |
| Northern elephant seal | 25 | 1.257     | 193.3099 | 1.2233    | 0.2894     | 0.9  | 0 |
| Northern elephant seal | 26 | 10.4972   | 156.0949 | 9.5978    | -4.2537    | 20   | B |
| Northern elephant seal | 26 | 15.1457   | 226.8613 | 10.3633   | 11.0518    | 1.8  | B |
| Northern elephant seal | 26 | 23.2053   | 102.3021 | 4.9746    | -22.6725   | 24.3 | B |
| Northern elephant seal | 26 | 7.8603    | 69.4074  | -2.7614   | -7.358     | 18.4 | B |
| Northern elephant seal | 26 | 19.5744   | 71.1206  | -6.3136   | -18.5213   | 3.6  | B |
| Northern elephant seal | 26 | 18.0121   | 312.2002 | -12.0864  | 13.3434    | 7.8  | A |
| Northern elephant seal | 26 | 8.2679    | 96.6146  | 0.9573    | -8.2129    | 0.4  | B |
| Northern elephant seal | 26 | 856.7449  | 288.6341 | -225.4303 | 813.1005   | 6.8  | A |
| Northern elephant seal | 26 | 1335.5327 | 260.7243 | 352.7003  | 1324.5432  | 13.9 | B |
| Northern elephant seal | 26 | 1128.1429 | 258.8814 | 314.9498  | 1110.7946  | 8.1  | A |
| Northern elephant seal | 26 | 25.42     | 247.7143 | 9.6825    | 23.5212    | 23.1 | B |
| Northern elephant seal | 26 | 7.5053    | 70.4031  | -2.5134   | -7.0705    | 11.3 | B |
| Northern elephant seal | 26 | 0.7785    | 146.1231 | 0.6464    | -0.434     | 18.5 | A |
| Northern elephant seal | 26 | 5.1898    | 306.5609 | -3.0901   | 4.1686     | 15.2 | B |
| Northern elephant seal | 26 | 1.6794    | 15.8611  | -1.6155   | -0.459     | 9.3  | B |
| Northern elephant seal | 26 | 2.852     | 306.8214 | -1.7088   | 2.283      | 14.6 | B |

|                        |    |          |          |           |          |      |   |
|------------------------|----|----------|----------|-----------|----------|------|---|
| Northern elephant seal | 26 | 1.0288   | 182.3481 | 1.0279    | 0.0421   | 14.4 | B |
| Northern elephant seal | 26 | 0.8371   | 121.1211 | 0.4327    | -0.7166  | 31   | A |
| Northern elephant seal | 26 | 24.7811  | 250.2478 | 8.419     | 23.3231  | 0.5  | A |
| Northern elephant seal | 26 | 9.1967   | 45.0123  | -6.4982   | -6.5044  | 19.6 | B |
| Northern elephant seal | 26 | 2.5734   | 243.7689 | 1.1378    | 2.3084   | 26.9 | B |
| Northern elephant seal | 26 | 3.4407   | 216.8149 | 2.7549    | 2.0618   | 1    | A |
| Northern elephant seal | 26 | 3.631    | 113.572  | 1.4529    | -3.328   | 15.9 | B |
| Northern elephant seal | 26 | 5.0911   | 98.5056  | 0.7551    | -5.0351  | 1    | B |
| Northern elephant seal | 26 | 9.7698   | 261.7842 | 1.4037    | 9.6696   | 0.2  | A |
| Northern elephant seal | 26 | 2.5853   | 178.5084 | 2.5844    | -0.0673  | 18.8 | B |
| Northern elephant seal | 26 | 15.2397  | 255.0666 | 3.9445    | 14.725   | 1    | B |
| Northern elephant seal | 26 | 4.2654   | 153.5129 | 3.8179    | -1.9023  | 19.7 | B |
| Northern elephant seal | 26 | 2.8725   | 65.0691  | -1.2103   | -2.6049  | 23.1 | B |
| Northern elephant seal | 26 | 13.3877  | 101.3374 | 2.645     | -13.1265 | 15   | B |
| Northern elephant seal | 26 | 9.2071   | 290.6659 | -3.2437   | 8.6146   | 0.4  | B |
| Northern elephant seal | 26 | 5.2457   | 98.1297  | 0.7439    | -5.1929  | 0.7  | B |
| Northern elephant seal | 26 | 13.9442  | 68.8064  | -5.0285   | -13.0011 | 0.4  | B |
| Northern elephant seal | 26 | 8.3469   | 29.3689  | -7.273    | -4.0936  | 4    | B |
| Northern elephant seal | 26 | 3.4646   | 239.2219 | 1.7735    | 2.9767   | 15.7 | B |
| Northern elephant seal | 26 | 9.9707   | 307.1589 | -6.0183   | 7.9463   | 18.1 | B |
| Northern elephant seal | 26 | 0.7153   | 6.6115   | -0.7106   | -0.0824  | 0.5  | O |
| Northern elephant seal | 26 | 19.284   | 67.0635  | -7.4948   | -17.7593 | 9.9  | A |
| Northern elephant seal | 26 | 9.6427   | 115.5448 | 4.1629    | -8.7001  | 17.5 | B |
| Northern elephant seal | 26 | 11.1642  | 313.322  | -7.6556   | 8.1221   | 18.3 | B |
| Northern elephant seal | 26 | 6.726    | 357.2981 | -6.7185   | 0.3171   | 1.2  | B |
| Northern elephant seal | 27 | 9.4946   | 83.7694  | -1.0251   | -9.4385  | 7.6  | B |
| Northern elephant seal | 27 | 16.9048  | 90.0531  | 0.0328    | -16.9048 | 12.4 | B |
| Northern elephant seal | 27 | 2.0249   | 297.346  | -0.93     | 1.7986   | 11.7 | B |
| Northern elephant seal | 27 | 17.315   | 98.8224  | 2.6733    | -17.1101 | 1.6  | B |
| Northern elephant seal | 27 | 857.6613 | 287.7075 | -219.1784 | 817.9284 | 19.5 | A |
| Northern elephant seal | 27 | 2.9023   | 281.3113 | -0.5687   | 2.8459   | 0.4  | B |
| Northern elephant seal | 27 | 127.5979 | 285.0338 | -31.9019  | 123.2358 | 15.5 | B |
| Northern elephant seal | 27 | 1.8802   | 22.2044  | -1.7408   | -0.7106  | 8.2  | B |
| Northern elephant seal | 27 | 3.8225   | 38.5403  | -2.9894   | -2.3816  | 0.7  | B |
| Northern elephant seal | 27 | 350.1967 | 256.5174 | 91.0183   | 340.6629 | 7.5  | B |
| Northern elephant seal | 27 | 82.7247  | 78.9476  | -15.3339  | -81.1919 | 17.4 | B |
| Northern elephant seal | 27 | 6.6704   | 118.184  | 3.153     | -5.8795  | 0.3  | B |
| Northern elephant seal | 27 | 6.0247   | 105.6801 | 1.6303    | -5.8005  | 0.2  | B |
| Northern elephant seal | 27 | 2.215    | 301.76   | -1.1657   | 1.8833   | 7.4  | B |
| Northern elephant seal | 39 | 23.1445  | 257.5416 | 5.0253    | 22.5995  | 0    | A |
| Northern elephant seal | 39 | 33.7954  | 260.0933 | 5.8846    | 33.2916  | 0    | Z |
| Northern elephant seal | 39 | 2.2167   | 116.2559 | 0.9809    | -1.988   | 0    | B |
| Northern elephant seal | 39 | 10.5213  | 70.5782  | -3.4921   | -9.9226  | 0    | A |
| Northern elephant seal | 39 | 29.2547  | 272.3384 | -1.1355   | 29.2304  | 0    | B |
| Northern elephant seal | 39 | 137.4189 | 249.578  | 49.0883   | 128.7856 | 0    | B |
| Northern elephant seal | 39 | 25.389   | 207.1446 | 22.6018   | 11.5834  | 0    | A |
| Northern elephant seal | 39 | 35.0785  | 268.8801 | 0.7727    | 35.0719  | 0    | B |
| Northern elephant seal | 39 | 0.1881   | 89.8829  | -0.0004   | -0.1881  | 0    | B |
| Northern elephant seal | 39 | 2.2109   | 291.6894 | -0.8168   | 2.0544   | 0    | B |
| Northern elephant seal | 39 | 5.2988   | 84.5478  | -0.5014   | -5.2748  | 0    | A |
| Northern elephant seal | 39 | 7.5715   | 246.9458 | 2.9686    | 6.9668   | 0    | A |
| Northern elephant seal | 39 | 8.5555   | 70.6244  | -2.8336   | -8.0709  | 0    | B |
| Northern elephant seal | 39 | 6.1852   | 252.0975 | 1.9039    | 5.8857   | 0    | A |
| Northern elephant seal | 39 | 69.3056  | 74.7274  | -17.9285  | -66.8587 | 0    | Z |
| Northern elephant seal | 39 | 25.2844  | 305.7504 | -14.7413  | 20.52    | 0    | Z |
| Northern elephant seal | 39 | 3.5182   | 265.8619 | 0.2548    | 3.509    | 0    | B |
| Northern elephant seal | 39 | 1.7686   | 127.9485 | 1.0877    | -1.3946  | 0    | A |
| Northern elephant seal | 39 | 4.5203   | 327.3935 | -3.8074   | 2.4358   | 0    | A |
| Northern elephant seal | 39 | 3.5984   | 108.9594 | 1.17      | -3.4032  | 0    | B |
| Northern elephant seal | 39 | 7.1373   | 243.175  | 3.2239    | 6.3693   | 0    | B |
| Northern elephant seal | 39 | 3.0928   | 226.5491 | 2.1274    | 2.2453   | 0    | A |
| Northern elephant seal | 39 | 78.5204  | 297.7267 | -36.1751  | 69.5049  | 0    | B |
| Northern elephant seal | 39 | 141.7093 | 241.0097 | 69.8306   | 123.9563 | 0    | B |
| Northern elephant seal | 39 | 19.0401  | 293.0185 | -7.4224   | 17.5241  | 0    | B |
| Northern elephant seal | 39 | 4.1822   | 96.9326  | 0.5061    | -4.1516  | 0    | O |
| Northern elephant seal | 39 | 31.5221  | 110.1937 | 10.9462   | -29.5845 | 0    | B |
| Northern elephant seal | 39 | 18.7218  | 295.6184 | -8.0738   | 16.8814  | 0    | B |
| Northern elephant seal | 39 | 2.2769   | 169.7842 | 2.2409    | -0.4038  | 0    | A |

|                        |    |         |          |         |          |   |   |
|------------------------|----|---------|----------|---------|----------|---|---|
| Northern elephant seal | 39 | 3.9575  | 68.7307  | -1.4346 | -3.6879  | 0 | A |
| Northern elephant seal | 39 | 4.8754  | 323.6214 | -3.9247 | 2.8917   | 0 | A |
| Northern elephant seal | 39 | 3.1599  | 323.8604 | -2.5516 | 1.8636   | 0 | A |
| Northern elephant seal | 39 | 86.7317 | 133.0651 | 59.4925 | -63.3639 | 0 | B |
| Northern elephant seal | 39 | 18.1952 | 116.9425 | 8.2617  | -16.2203 | 0 | 0 |
| Northern elephant seal | 39 | 0.4575  | 330.4977 | -0.3982 | 0.2253   | 0 | 2 |
| Northern elephant seal | 39 | 7.2413  | 159.1858 | 6.7691  | -2.5731  | 0 | A |
| Northern elephant seal | 39 | 3.2906  | 122.7314 | 1.7798  | -2.7681  | 0 | B |
| Northern elephant seal | 39 | 28.1872 | 208.7075 | 24.7338 | 13.5394  | 0 | B |
| Northern elephant seal | 39 | 6.0092  | 173.5311 | 5.971   | -0.677   | 0 | B |
